# Supplementary material for: Phenylalanyl tRNA synthetase (PheRS) substrate mimics: design, synthesis, molecular dynamics and antimicrobial evaluation
Source: Royal Society of Chemistry journal article supplement (doi:10.1039/d1ra06439h), 2022-01-01
Supplement: d1ra06439h1.pdf [file d1ra06439h1.pdf]

## **Phenylalanyl tRNA synthetase (PheRS) substrate mimics: Design, synthesis, molecular dynamics and antimicrobial evaluation**

Nada A. Nouredin<sup>a,b,\*</sup>, Jennifer Richards<sup>c</sup>, Hend Kothayer<sup>b</sup>, Mohammed M. Baraka<sup>b</sup>, Sobhy M. Eladl<sup>b</sup>, Mandy Wootton<sup>c</sup>, Claire Simons<sup>a</sup>

<sup>a</sup>*School of Pharmacy and Pharmaceutical Sciences, Cardiff University, Cardiff CF10 3NB, U.K.*

<sup>b</sup>*Department of Medicinal Chemistry, Faculty of Pharmacy, Zagazig University, Zagazig P.C. 44519, Egypt*

<sup>c</sup>*Specialist Antimicrobial Chemotherapy Unit, University Hospital of Wales, Heath Park, Cardiff CF14 4XW, U.K.*

\*Correspondence: [NaNouredine@pharmacy.zu.edu.eg](mailto:NaNouredine@pharmacy.zu.edu.eg)

<sup>1</sup> School of Pharmacy and Pharmaceutical Sciences, Cardiff University, Cardiff CF10 3NB, United Kingdom

<sup>2</sup> Department of Medicinal Chemistry, Faculty of Pharmacy, Zagazig University, Zagazig P.C. 44519, Egypt

## Electronic supplementary information

### 1. Microbiological evaluation results:

Table. S1| MIC (µg/mL) for the synthesised compounds (5a-b), (6a-e), (7a-d) and (9a-e)

| Compound             | <i>S. aureus</i><br>ATCC<br>29213 | <i>E. faecalis</i><br>ATCC<br>29212 | <i>P. aeruginosa</i><br>ATCC<br>29853 | <i>E. coli</i><br>ATCC<br>25922 | <i>K. pneumoniae</i><br>ATCC<br>700603 |
|----------------------|-----------------------------------|-------------------------------------|---------------------------------------|---------------------------------|----------------------------------------|
| <b>5a</b>            | >128                              | 128                                 | 128                                   | >128                            | >128                                   |
| <b>5b</b>            | >128                              | 128                                 | 128                                   | >128                            | 128                                    |
| <b>6a</b>            | 128                               | 128                                 | 128                                   | >128                            | 128                                    |
| <b>6b</b>            | 128                               | 128                                 | 128                                   | >128                            | 128                                    |
| <b>6c</b>            | 128                               | 128                                 | 128                                   | >128                            | 128                                    |
| <b>6d</b>            | 128                               | 128                                 | 128                                   | >128                            | 128                                    |
| <b>6e</b>            | 128                               | 128                                 | 128                                   | 128                             | 128                                    |
| <b>7a</b>            | 128                               | 128                                 | 128                                   | 128                             | 128                                    |
| <b>7b</b>            | 128                               | 128                                 | 128                                   | >128                            | 128                                    |
| <b>7c</b>            | >128                              | 128                                 | 128                                   | >128                            | 128                                    |
| <b>7d</b>            | 128                               | 128                                 | 128                                   | 128                             | 128                                    |
| <b>9a</b>            | 128                               | 128                                 | 128                                   | >128                            | 128                                    |
| <b>9b</b>            | 128                               | 64                                  | 128                                   | >128                            | 128                                    |
| <b>9c</b>            | 128                               | 128                                 | 128                                   | >128                            | >128                                   |
| <b>9d</b>            | 128                               | 64                                  | 128                                   | >128                            | 128                                    |
| <b>9e</b>            | 64                                | 32                                  | 128                                   | >128                            | 128                                    |
| <b>ciprofloxacin</b> | 0.25                              | 1                                   | 0.5                                   | 0.008                           | 0.25                                   |

Table. S2| MIC ( $\mu\text{g/mL}$ ) for the synthesised compounds (16a-c)

| Compound             | <i>S. aureus</i><br>ATCC 29213 | MRSA<br>NCTC 12493 | <i>E. faecalis</i><br>ATCC 29212 | <i>E. faecium</i><br>16568 |
|----------------------|--------------------------------|--------------------|----------------------------------|----------------------------|
| <b>16a</b>           | 128                            | 64                 | 64                               | 32                         |
| <b>16b</b>           | 128                            | 64                 | 128                              | 64                         |
| <b>16c</b>           | 128                            | 64                 | 32                               | 32                         |
| <b>ciprofloxacin</b> | 0.25                           | 0.5                | 0.5                              | 1                          |

## 2. Computational studies supplementary information:

### 2.1. Flexible alignment studies:

Flexible alignment and docking studies were performed using MOE 2015.10 software<sup>1</sup>. Flexible alignment was performed using MMFF94 forcefield, flexible alignment mode and the resulted conformations were examined according to their grand alignment score (S). The latter is the sum of the similiraity measure of configuration (F) and the average strain energy of the molecules in the alignment in kcal/mol (U). The lower S value indicates better alignment.

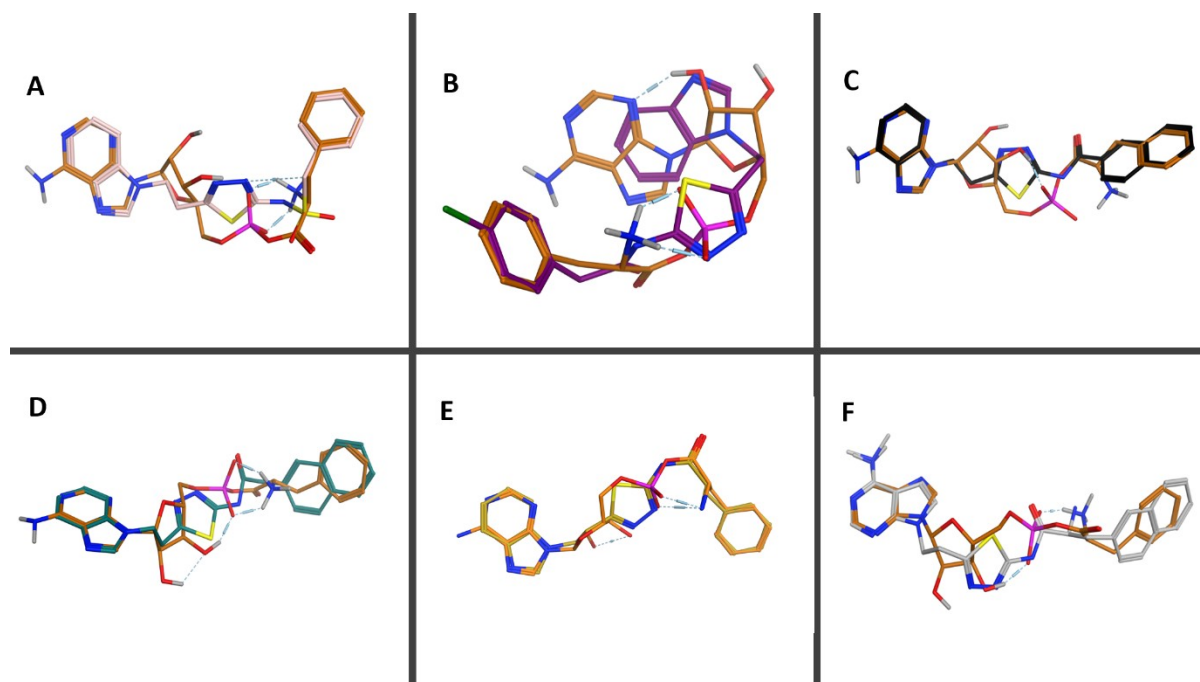

**Fig. S1.** 3D molecular alignment results. Phe-AMP is presented in orange colour. (A) **5a** (pink colour)  $S = -170.1604$ , (B) **6c** (purple colour)  $S = -154.4615$ , (C) **6e** (black colour)  $S = -159.4926$ , (D) **7d** (green colour)  $S = -162.6272$ , (E) **9a** (yellow colour)  $S = -190.7823$  and (F) **16c** (grey colour)  $S = -206.69$

## 2.2. Multiple sequence alignment:

CLUSTAL O(1.2.4) multiple sequence alignment

```

sp|Q9I0A3|SYFA_PSEAE  --MENLDALVSQALEAVRHTEDVNALQIRVHYLGKKGELTQVMKTLGDLPAEERPKVG  57
sp|A6TAI3|SYFA_KLEP7  --MSHLAELVASAKAAINEASDVAALDNVRVEYLGKKGHLTLQMTTLRELPPPEERPAAG  57
sp|P08312|SYFA_ECOLI  --MSHLAELVASAKAAISQASDVAALDNVRVEYLGKKGHLTLQMTTLRELPPPEERPAAG  57
sp|P68849|SYFA_STAAU  MSEQQTMSELKQQALVDINEANDERALQEVKVKYLGKKGSVSGLMKMLKDLNPEEKPAFG  60
sp|Q836J6|SYFA_ENTFA  MTLQAQLEALRDNTLKEIAQVATLKELNQIRVETLGKKGPITEVLRGMKNLSPEERPVVG  60
                        : * . : : . * : : * : : : * : : * : : * : : *

sp|Q9I0A3|SYFA_PSEAE  ALINVAKKQVDVLNARKTELEGAALAAERIDVTLPGRGQLSGGLHPVTRTTLERIE  117
sp|A6TAI3|SYFA_KLEP7  AVINEAKEVQQALNARKAELEGAALNARLAAETIDVSLPGRRIENGGLHPVTRTIDRIE  117
sp|P08312|SYFA_ECOLI  AVINEAKEVQQALNARKAELESAALNARLAAETIDVSLPGRRIENGGLHPVTRTIDRIE  117
sp|P68849|SYFA_STAAU  QKVNELRQTIQNELDERQQMLVKEKLNQLAEETIDVSLPGRHIEIGSKHPLRTTIEEIE  120
sp|Q836J6|SYFA_ENTFA  GFANEIRDLLTEATEARKVYLEALNAALKEESLDVTLPGKQMPQGRHILTQVMEIEIE  120
                        * : : : : : * : * * * : : * : : * : : * : : *

sp|Q9I0A3|SYFA_PSEAE  QCFSRIGYEAEGPEVEDDYHNFALNIPGHHPARAMHDTFYFANMLLRTHTSVPVQVRT  177
sp|A6TAI3|SYFA_KLEP7  SFFGELGFTVATGPEIEDDYHNFALNIPGHHPARADHDTFWFDRLLRTQTSVGQVIRT  177
sp|P08312|SYFA_ECOLI  SFFGELGFTVATGPEIEDDYHNFALNIPGHHPARADHDTFWFDRLLRTQTSVGQVIRT  177
sp|P68849|SYFA_STAAU  DLFLGLGYEIVNGYEVEQDHYNFEMNLNPKSHPARDMQDSFYITDEILLRTHTSVPVQART  180
sp|Q836J6|SYFA_ENTFA  DIFLGMGYQVVEGYEVESDHYNFERMNLPKDHPARDMQDTFYISDEMLIRTHTSVPVQART  180
                        . * : : : . * : : * : : * : : * : : * : : * : : *

sp|Q9I0A3|SYFA_PSEAE  MESQ--QPPRIIVCPGRVYRCDS-LTHSPMFHQVEGLLVDEGVSFADLKGTIEEFLRA  233
sp|A6TAI3|SYFA_KLEP7  MENQ--QPPRIIAPGRVYRNDYD-QTHTPMFHQMEGLIVDKNISFTNLKGTLDHFLNN  233
sp|P08312|SYFA_ECOLI  MKAQ--QPPRIIAPGRVYRNDYD-QTHTPMFHQMEGLIVDTNISFTNLKGTLDHFLRN  233
sp|P68849|SYFA_STAAU  MESR-HGQGPVKIICPGKVYRDSDDATHSHQFTQIEGLVVDKNVKMSDLKGTLELLAKK  239
sp|Q836J6|SYFA_ENTFA  MEKHDFSGALRMISPGKVFRDRTDDATHSHQFHQIEGLVVDKNVTMGDLKGTLEVMKK  240
                        * : : : : : * : : * : : * : : * : : * : : * : : *

sp|Q9I0A3|SYFA_PSEAE  FFEKQLEVRFRPSFFPTEPSAEVDIQVCISGNGCRVCKQTGWLEVMGCMVHPNVLRM  293
sp|A6TAI3|SYFA_KLEP7  FFEEDLQVRFRRPSYFPFTEPSAEVDVM-----GKNGKWLLEVLGCGMVHPNVLRN  282
sp|P08312|SYFA_ECOLI  FFEEDLQIRFRPSYFPFTEPSAEVDVM-----GKNGKWLLEVLGCGMVHPNVLRN  282
sp|P68849|SYFA_STAAU  LFGADREIRLRPSYFPFTEPSVEVDVSCFKCKGKGCNVCKHTGWIEILGAGMVHPNVLEM  299
sp|Q836J6|SYFA_ENTFA  MFGEDRKIRLRPSYFPFTEPSVEVDVSCFKCGGAGCNVCKHTGWIEILGAGMVHPDVLQM  300
                        : * : : * : : * : : * : : * : : * : : * : : * : : *

sp|Q9I0A3|SYFA_PSEAE  SNIDPEKFQGFAGFMGAERLAMLRYGVNDLRLFFDNDLRLFLGQFR-----  338
sp|A6TAI3|SYFA_KLEP7  VGIDPEVYSGFAFGMGMERLTMLRYGVTDLRAFFENDLRLFLKQFK-----  327
sp|P08312|SYFA_ECOLI  VGIDPEVYSGFAFGMGMERLTMLRYGVTDLRSFFENDLRLFLKQFK-----  327
sp|P68849|SYFA_STAAU  AGFDSSEYSGFAFGMGPDRIAMLYKGIEDIRHFYTNVRFLDQFKAVEDRGDM  352
sp|Q836J6|SYFA_ENTFA  SGIDPTEYSGFAFGLGPDVAMLYRYGVNDRNFYQNDLRLFLNQFKVKE-----  348
                        . : * : : * : : * : : * : : * : : * : : * : : *

```

**Fig. S2.** Multiple sequence alignment<sup>2</sup> of PheRS  $\alpha$  subunit amino acid sequences from *P. aeruginosa* (Q9I0A3), *K. pneumoniae* (A6TAI3), *E. coli* (P08312), *S. aureus* (P68849) and *E. faecalis* (Q836J6). Yellow boxes show residues responsible for hydrophobic interactions. While green boxes show residues responsible for hydrophilic interaction. A high level of conservation among sequences could be observed.

## 2.3. Homology model evaluation:

### 2.3.1. Ramachandran plot:

Almost 98% of the amino acids are in the allowed region with only 3 amino acids observed in the outlier region which are Asp 185, Leu 191 and Gly 273 and all of them are not a part of the enzyme's active site.

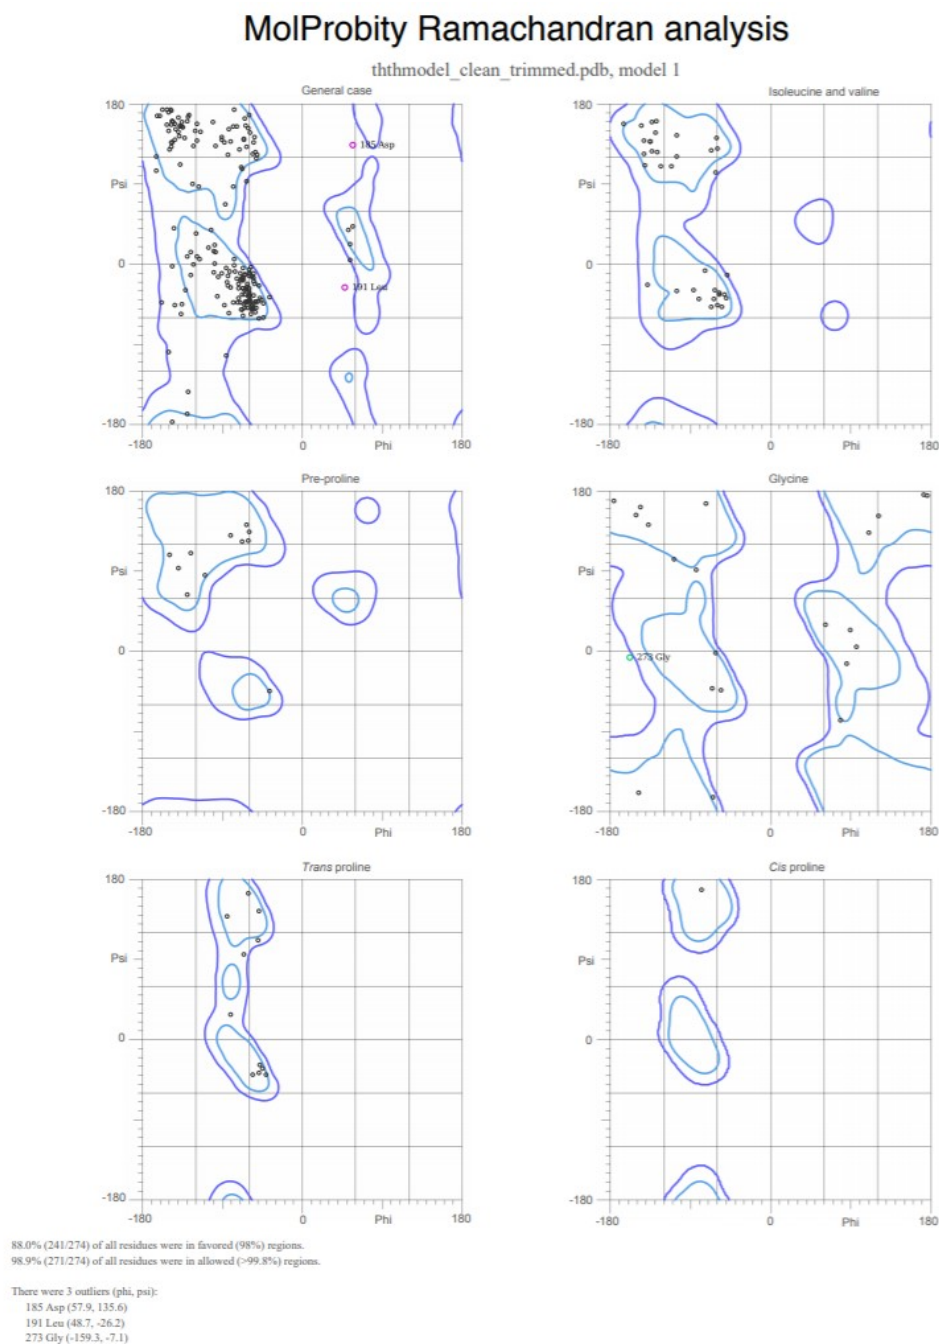

**Fig. S3|** Ramachandran plot of *E. faecalis* model.<sup>3</sup>

### 2.3.2. ProSA analysis:

ProSA analysis revealed good quality model as its Z-score is among the same sized solved protein structures and equal to -7.15 and the internal energy of each amino acid in the protein 3D structure is with negative value (Table. S3).

**Table. S3** ProSA analysis results of *E. faecalis* model. <sup>4, 5</sup>

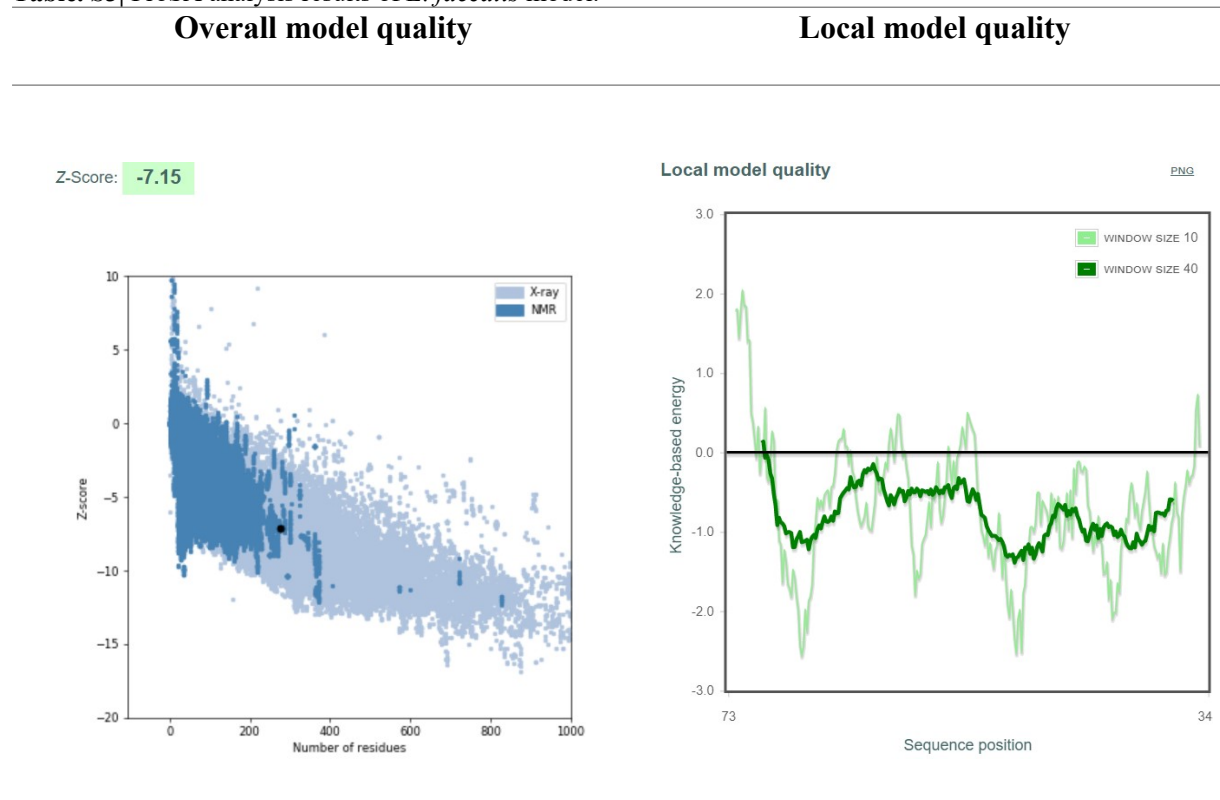

### 2.3.3. Verify 3D:

The newly constructed model passed the 3D verification as 86.32% of its amino acids have scored more than or equal to 0.2.

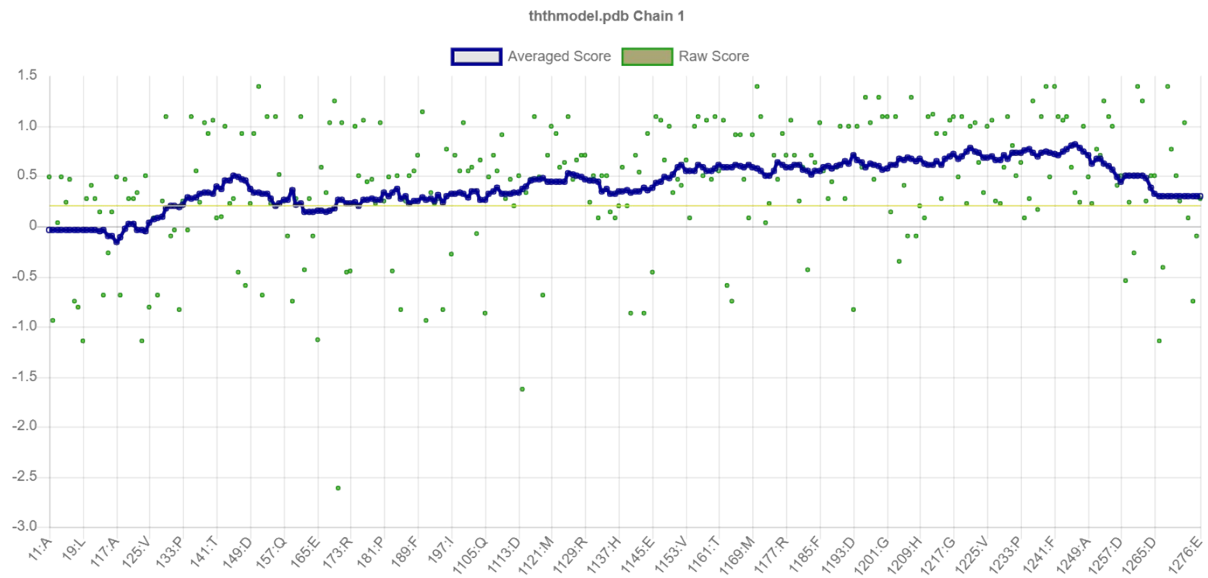

**Fig. S4|** 3D profile of *E. faecalis* model. <sup>6</sup>

### 3. Chemistry supplementary information:

#### 3.1. Preparation methods for compounds 3,4 and 12:

##### 3.1.1. 3-(1*H*-Benzo[d]imidazol-1-yl) propanehydrazide (**3**)<sup>7,8</sup>

To a solution of the methyl propanoate ester (**2**) (3 g, 14.69 mmol) in EtOH (125 mL) was added hydrazine monohydrate (10 equivalents) and the reaction mixture was stirred at room temperature overnight. The formed solid was collected by filtration and recrystallised from EtOAc and petroleum ether to give the pure hydrazide compound (**3**) as white crystals; yield 2.5 g (84%); m.p. 105-110 °C; TLC CH<sub>2</sub>Cl<sub>2</sub>-MeOH 9:1 v/v, R<sub>f</sub> = 0.29; <sup>1</sup>H NMR (DMSO-*d*<sub>6</sub>) δ: 2.60 (t, *J* = 6.7 Hz, 2H, CH<sub>2</sub>CO), 4.19 (s, 2H, NH<sub>2</sub>), 4.47 (t, *J* = 6.6 Hz, 2H, CH<sub>2</sub>CH<sub>2</sub>), 7.21 (t, *J* = 7.2 Hz, 1H, Ar), 7.26 (t, *J* = 8.1 Hz, 1H, Ar), 7.58 (d, *J* = 8.00 Hz, 1H, Ar), 7.62 (d, *J* = 7.9 Hz, 1H, Ar), 8.11 (s, 1H, H-imidazole), 9.06 (s, 1H, NH). <sup>13</sup>C NMR (DMSO-*d*<sub>6</sub>) δ: 34.1 (CH<sub>2</sub>CO), 40.9 (NCH<sub>2</sub>CH<sub>2</sub>), 110.9 (CH), 119.8 (CH), 122.1 (CH), 122.9 (CH), 134.0 (C), 143.6 (C), 144.4 (CH-imidazole), 169.5 (CO).

##### 3.1.2. 5-(2-(1*H*-Benzo[d]imidazol-1-yl)ethyl)-1,3,4-thiadiazol-2-amine (**4**)<sup>7</sup>

To a stirred mixture of the hydrazide (0.5 g, 2.45 mmol) in dry IPA (20 mL), was added (trimethylsilyl)isothiocyanate (TMSNCS) (1.38 mL, 9.8 mmol), then the mixture was heated under reflux overnight. The solvent was then concentrated under vacuum and c.H<sub>2</sub>SO<sub>4</sub> (10 mL) was added, and the reaction stirred at room temperature for 2 h. The reaction was poured into crushed ice and neutralised using NH<sub>4</sub>OH in -70°C dry ice/acetone bath. The resulting solid was collected by filtration, washed with H<sub>2</sub>O and petroleum ether and dried *in vacuo* at 40 °C to afford the product as a yellow solid. Yield 0.3 g (53%); m.p. 208- 210°C (Lit. m.p. 182-184<sup>2</sup>); TLC CH<sub>2</sub>Cl<sub>2</sub>-MeOH 9:1 v/v, R<sub>f</sub> 0.49. <sup>1</sup>H NMR (DMSO-*d*<sub>6</sub>) δ: CH<sub>2</sub> signal is obscured by DMSO-*d*<sub>6</sub> signal, 4.59 (t, *J* = 6.8 Hz, 2H, CH<sub>2</sub>CH<sub>2</sub>), 7.03 (s, 2H, NH<sub>2</sub>), 7.21 (t, *J* = 7.3 Hz, 1H, Ar), 7.26 (t, *J* = 7.6 Hz, 1H, Ar), 7.63 (t, *J* = 8.6 Hz, 2H, Ar), 8.15 (s, 1H, H-imidazole). <sup>13</sup>C NMR (DMSO-*d*<sub>6</sub>) δ: 30.3 (NCH<sub>2</sub>CH<sub>2</sub>), 43.7 (NCH<sub>2</sub>), 110.9 (CH), 119.9 (CH), 122.0 (CH), 122.8 (CH), 134.1 (C), 143.9 (C), 144.6 (CH-imidazole), 154.7 (C), 169.1 (C).

##### 3.1.3. Methyl 3-(4-(dimethylamino)-7*H*-pyrrolo[2,3-*d*]pyrimidin-7-yl)propanoate (**12**)<sup>9</sup>

Prepared using *N,N*-dimethyl-7*H*-pyrrolo[2,3-*d*]pyrimidin-4-amine (**11**) (2 g, 12.33 mmol). The product was pure enough to be used in next steps with any further purification needed and separated as yellow low melting solid. Yield: 2.54 g, 83%; m.p. 52-54 °C; TLC: CH<sub>2</sub>Cl<sub>2</sub>-MeOH



9:1 v/v,  $R_f$  0.75.  $^1\text{H}$  NMR ( $\text{DMSO-}d_6$ )  $\delta$ : 2.85 (t,  $J = 7.0$  Hz, 2H,  $\text{CH}_2\text{CO}$ ), 3.28 (s, 6H,  $\text{N}(\text{CH}_3)_2$ ), 3.58 (s, 3H,  $\text{OCH}_3$ ), 4.38 (t,  $J = 7.0$  Hz, 2H,  $\text{NCH}_2$ ), 6.62 (d,  $J = 3.6$  Hz, 1H, Ar), 7.18 (d,  $J = 3.7$  Hz, 1H, Ar), 8.14 (s, 1H, Ar).  $^{13}\text{C}$  NMR ( $\text{DMSO-}d_6$ )  $\delta$ : 34.6 ( $\underline{\text{C}}\text{H}_2\text{CO}$ ), 39.1 ( $\text{N}(\text{CH}_3)_2$ ),  $\text{CH}_2$  peak is obscured by  $\text{DMSO-}d_6$  peak, 52.0 ( $\text{OCH}_3$ ), 101.7 (CH), 102.9 (C), 124.2 (CH), 150.5 (C), 151.2 (CH), 157.4 (C), 171.7 (CO).

### 3.2. NMR Charts for compounds (5a-b), (6a-e), (7a-d), (9a-e) and (16a-c)

5a

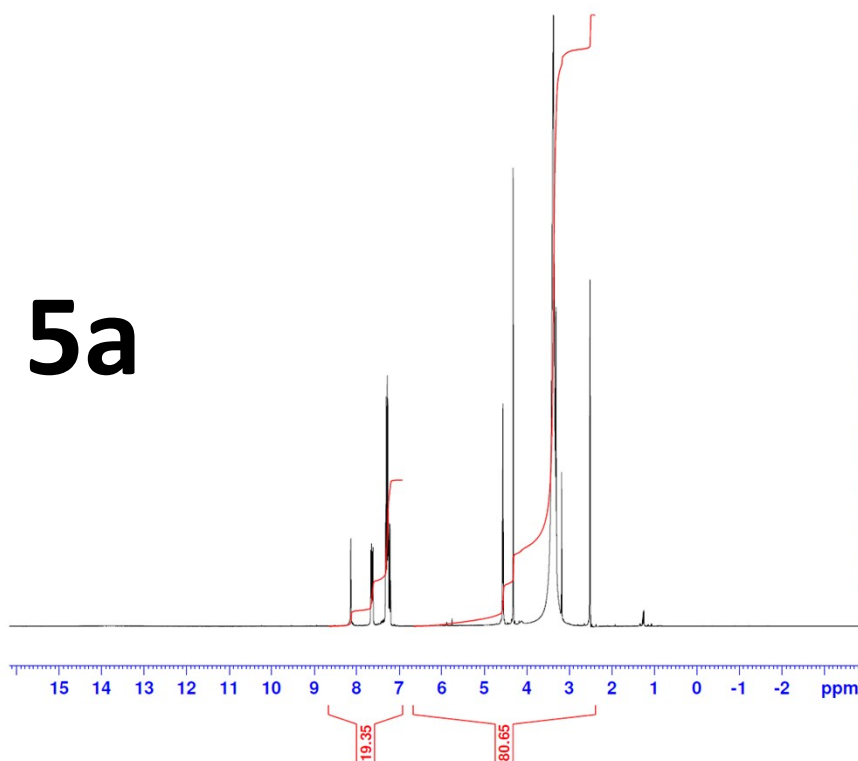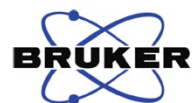

Current Data Parameters  
NAME NA16  
EXPNO 1  
PROCNO 1

F2 - Acquisition Parameters  
Date\_ 20190711  
Time 10.14 h  
INSTRUM spect  
PROBHD Z113652\_0266 (   
PULPROG zg30  
ID 65536  
SOLVENT DMSO  
NS 16  
DS 2  
SWH 10000.000 Hz  
FIDRES 0.305176 Hz  
AQ 3.2767999 sec  
RG 85.54  
DW 50.000 usec  
DE 13.50 usec  
TE 298.1 K  
D1 1.00000000 sec  
TD0 1  
SFO1 500.1330883 MHz  
NUC1 1H  
P1 10.00 usec  
PLW1 21.07600021 W

F2 - Processing parameters  
SI 65536  
SF 500.1300000 MHz  
WDW EM  
SSB 0  
LB 0.30 Hz  
GB 0  
PC 1.00

5a

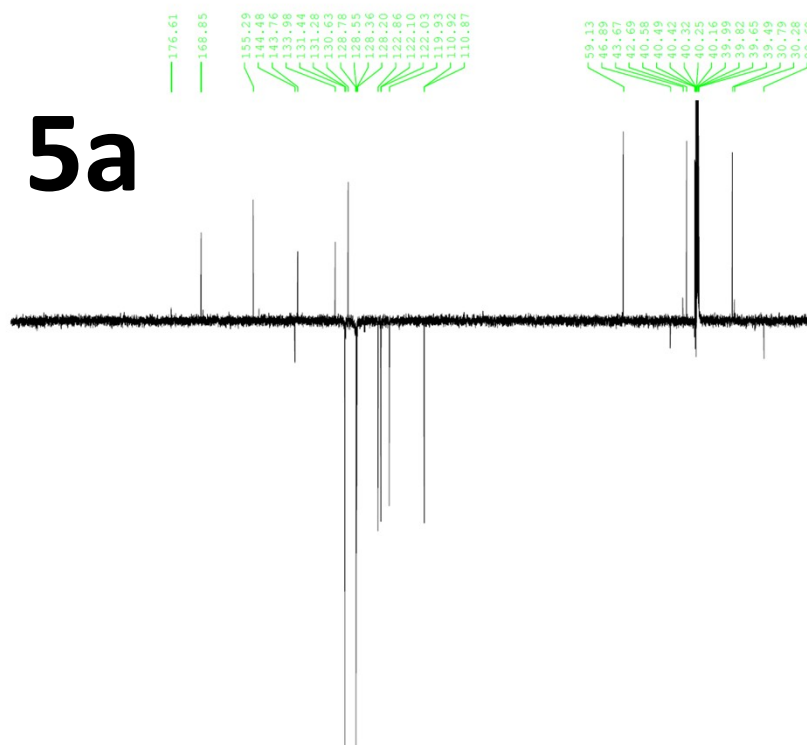

5b

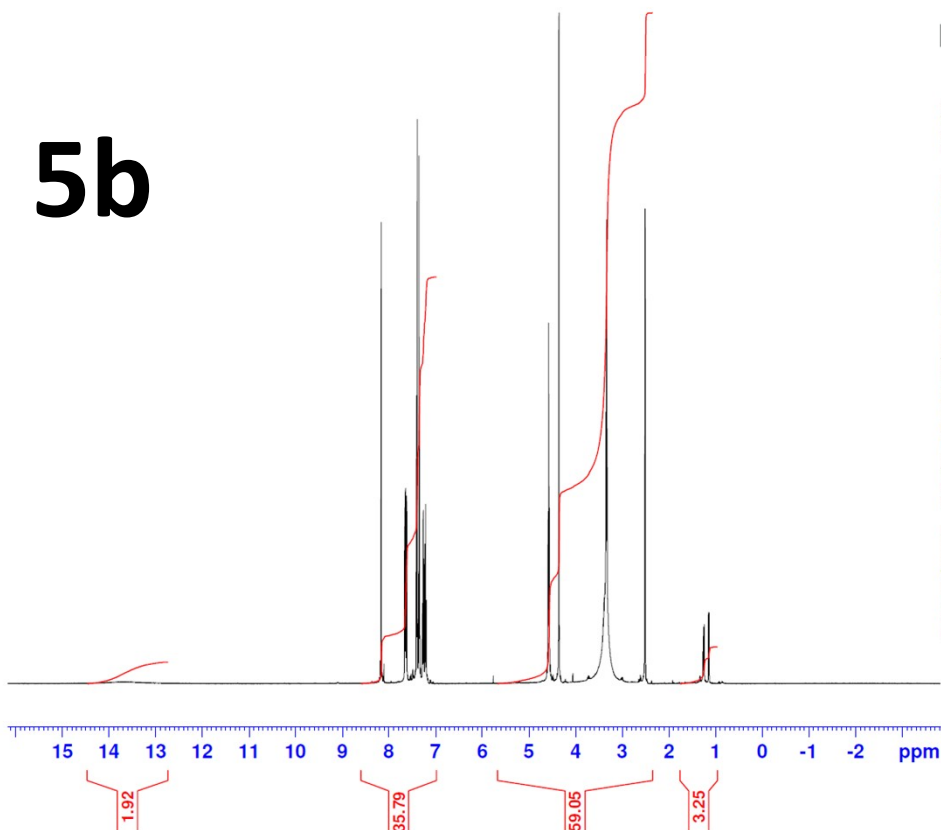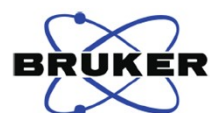

Current Data Parameters  
NAME NA129  
EXPNO 1  
PROCNO 1

F2 - Acquisition Parameters  
Date\_ 20191016  
Time 15.56 h  
INSTRUM spect  
PROBHD Z113652\_0266  
PULPROG zg30  
TD 65536  
SOLVENT DMSO  
NS 16  
DS 2  
SWH 10000.000 Hz  
FIDRES 0.305176 Hz  
AQ 3.2767999 sec  
RG 118.43  
DW 50.000 usec  
DE 13.50 usec  
TE 298.2 K  
D1 1.00000000 sec  
TD0 1  
SFO1 500.1330883 MHz  
NUC1 1H  
P1 10.00 usec  
PLW1 21.07600021 W

F2 - Processing parameters  
SI 65536  
SF 500.1300000 MHz  
WDW EM  
SSB 0  
LB 0.30 Hz  
GB 0  
PC 1.00

5b

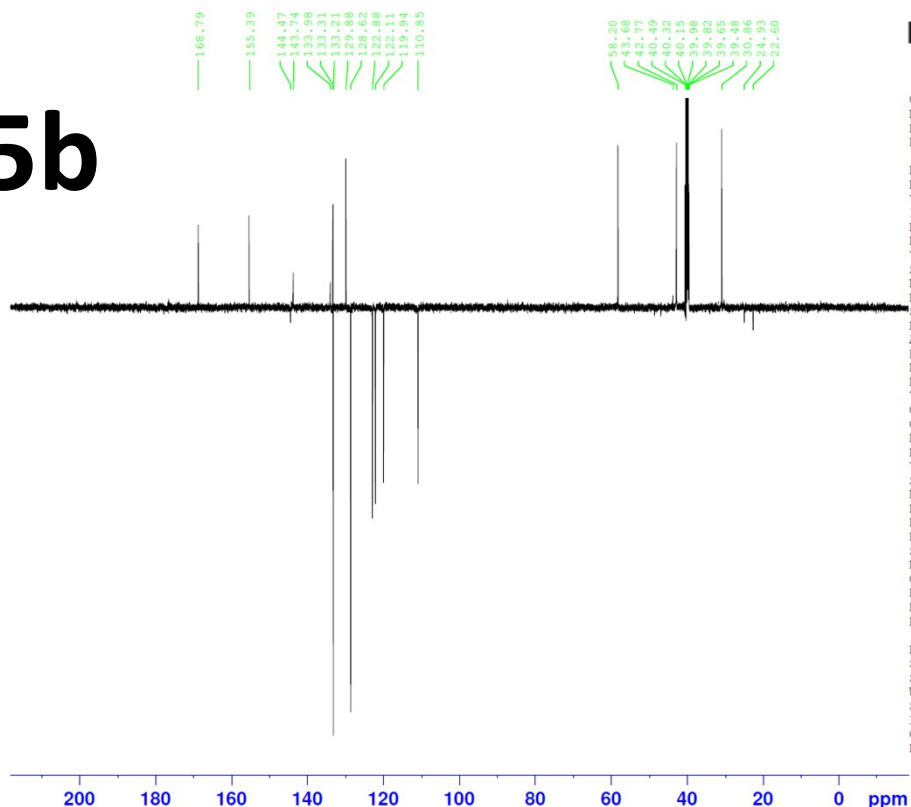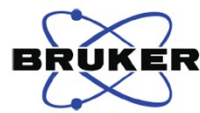

Current Data Parameters  
NAME NA129  
EXPNO 3  
PROCNO 1

F2 - Acquisition Parameters  
Date\_ 20191024  
Time 3.12 h  
INSTRUM spect  
PROBHD Z113652\_0266  
PULPROG jmod  
TD 65536  
SOLVENT DMSO  
NS 1024  
DS 4  
SWH 29761.904 Hz  
FIDRES 0.908261 Hz  
AQ 1.1010048 sec  
RG 189.93  
DW 16.800 usec  
DE 6.50 usec  
TE 298.2 K  
CNST2 145.0000000  
CNST11 1.0000000  
D1 2.00000000 sec  
D20 0.00689655 sec  
TD0 1  
SFO1 125.7703643 MHz  
NUC1 13C  
P1 10.00 usec  
P2 20.00 usec  
PLW1 74.02700043 W  
SFO2 500.1320005 MHz  
NUC2 1H  
CPDPRG2 waltz16  
PCPD2 80.00 usec  
PLW2 21.07600021 W  
PLW12 0.32931000 W

F2 - Processing parameters  
SI 32768  
SF 125.7577885 MHz  
WDW EM  
SSB 0  
LB 1.00 Hz  
GB 0  
PC 1.40

# 6a

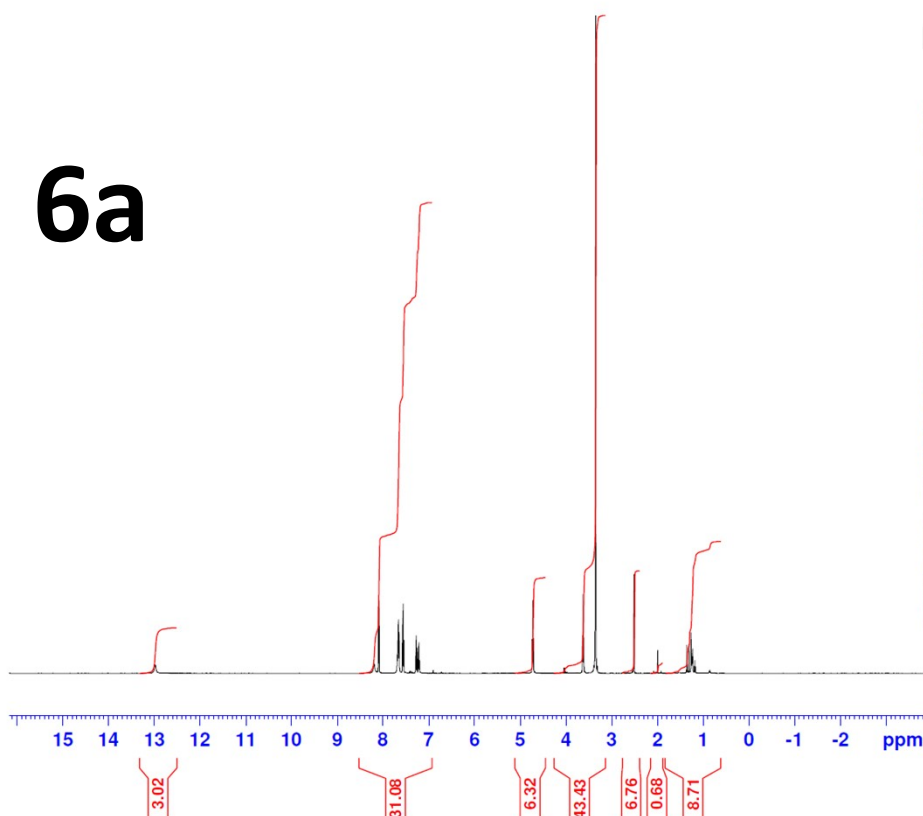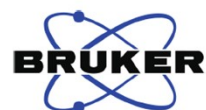

Current Data Parameters  
NAME NA111  
EXPNO 1  
PROCNO 1

F2 - Acquisition Parameters  
Date\_ 20190812  
Time 14.49 h  
INSTRUM spect  
PROBHD Z113652\_0266 (zg30)  
PULPROG 65536  
TD 16  
SOLVENT DMSO  
NS 2  
DS 10000.000 Hz  
SWH 0.305176 Hz  
FIDRES 3.2767999 sec  
AQ 104.67  
RG 50.000 usec  
DE 13.50 usec  
TE 298.2 K  
D1 1.00000000 sec  
TD0 1  
SFO1 500.1330883 MHz  
NUC1 1H  
P1 10.00 usec  
PLW1 21.07600021 W

F2 - Processing parameters  
SI 65536  
SF 500.1300000 MHz  
WDW EM  
SSB 0  
LB 0.30 Hz  
GB 0  
PC 1.00

# 6a

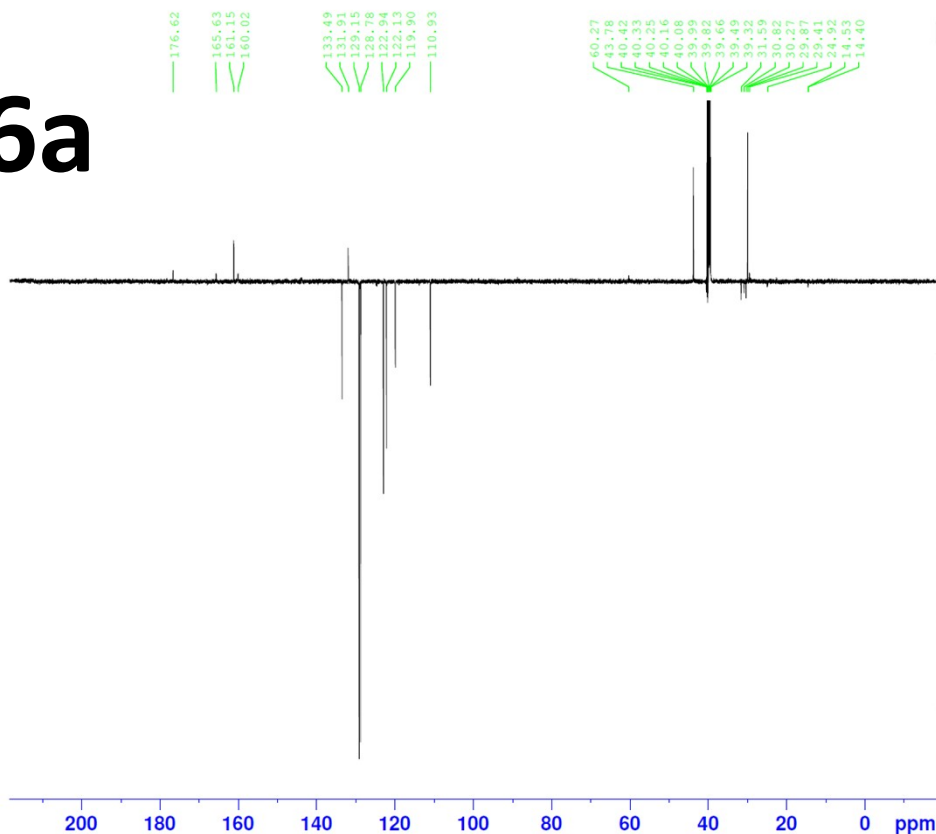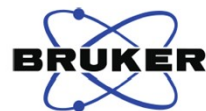

Current Data Parameters  
NAME NA111  
EXPNO 4  
PROCNO 1

F2 - Acquisition Parameters  
Date\_ 20190821  
Time 3.48 h  
INSTRUM spect  
PROBHD Z113652\_0266 (jmod)  
PULPROG 65536  
TD 3072  
SOLVENT DMSO  
NS 4  
DS 29761.904 Hz  
SWH 0.908261 Hz  
FIDRES 1.1010048 sec  
AQ 189.93  
RG 16.800 usec  
DE 6.50 usec  
TE 298.2 K  
CNST2 145.0000000  
CNST11 1.0000000  
D1 2.00000000 sec  
D20 0.00689655 sec  
TD0 1  
SFO1 125.7703643 MHz  
NUC1 13C  
P1 10.00 usec  
P2 20.00 usec  
PLW1 74.02700043 W  
SFO2 500.1320005 MHz  
NUC2 1H  
CPDPRG2 waltz16  
PCPD2 80.00 usec  
PLW2 21.07600021 W  
PLW12 0.32931000 W

F2 - Processing parameters  
SI 32768  
SF 125.7577885 MHz  
WDW EM  
SSB 0  
LB 1.00 Hz  
GB 0  
PC 1.40

6b

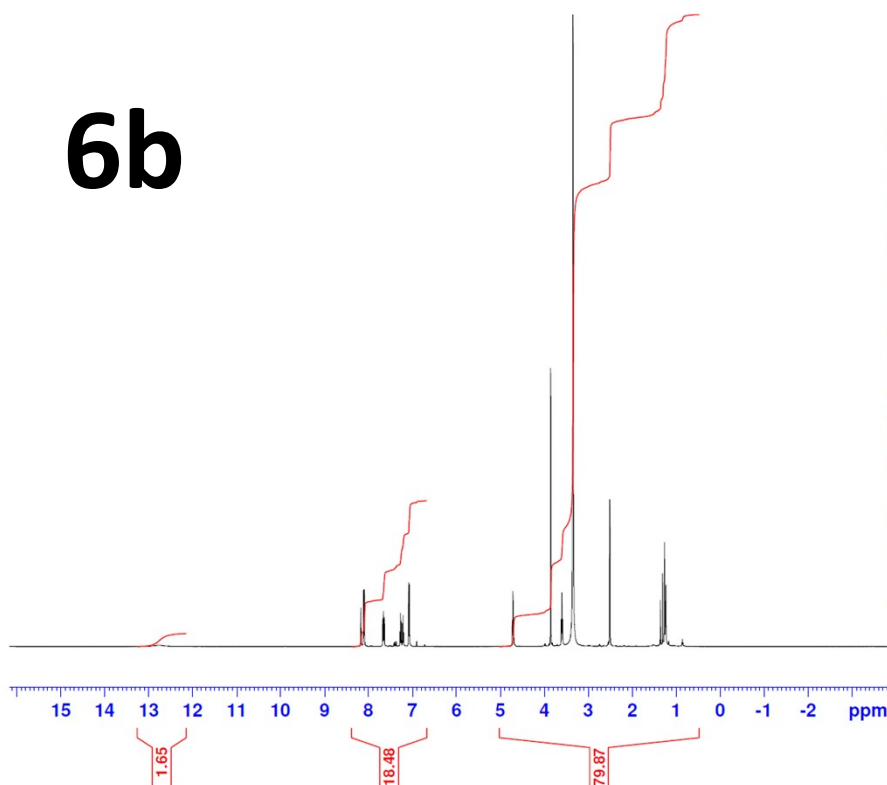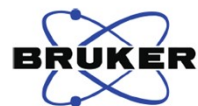

Current Data Parameters  
NAME NAl13  
EXPNO 2  
PROCNO 1

F2 - Acquisition Parameters  
Date\_ 20191016  
Time 15.30 h  
INSTRUM spect  
PROBHD Z113652\_0266 (   
PULPROG zg30  
TD 65536  
SOLVENT DMSO  
NS 16  
DS 2  
SWH 10000.000 Hz  
FIDRES 0.305176 Hz  
AQ 3.2767999 sec  
RG 118.43  
DW 50.000 usec  
DE 13.50 usec  
TE 298.2 K  
D1 1.00000000 sec  
TD0 1  
SFO1 500.1330883 MHz  
NUC1 1H  
P1 10.00 usec  
PLW1 21.07600021 W

F2 - Processing parameters  
SI 65536  
SF 500.1300000 MHz  
WDW EM  
SSB 0  
LB 0.30 Hz  
GB 0  
PC 1.00

6b

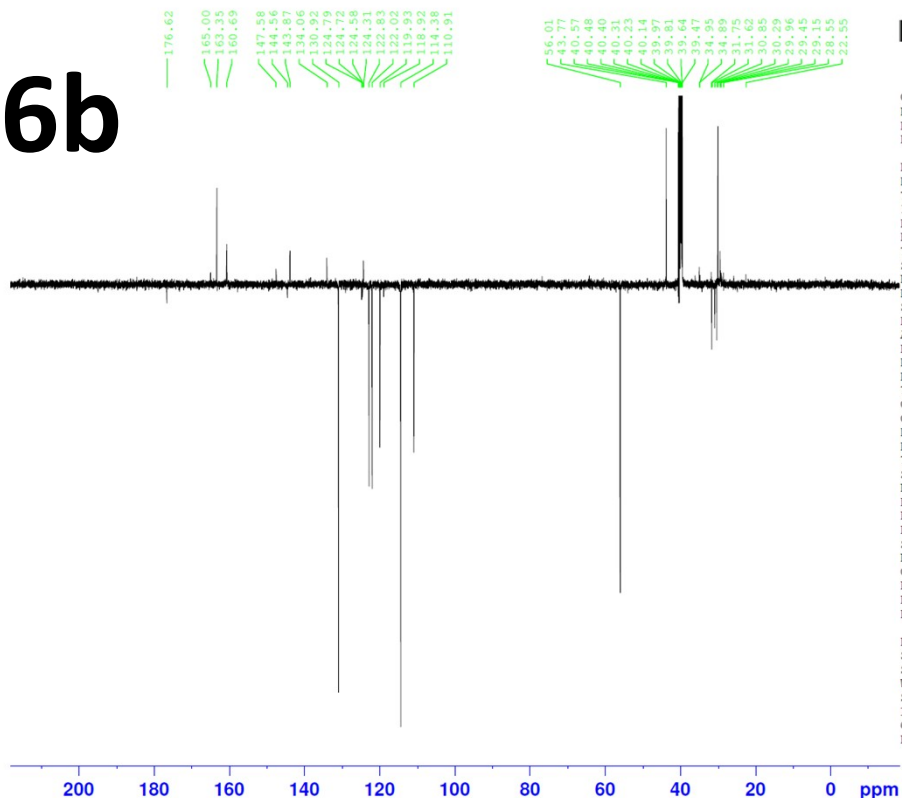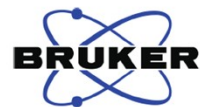

Current Data Parameters  
NAME NAl13  
EXPNO 3  
PROCNO 1

F2 - Acquisition Parameters  
Date\_ 20191024  
Time 2.14 h  
INSTRUM spect  
PROBHD Z113652\_0266 (   
PULPROG jmod  
TD 65536  
SOLVENT DMSO  
NS 3072  
DS 4  
SWH 29761.904 Hz  
FIDRES 0.908261 Hz  
AQ 1.1010048 sec  
RG 189.93  
DW 16.800 usec  
DE 6.50 usec  
TE 298.2 K  
CNST2 145.0000000  
CNST11 1.0000000  
D1 2.00000000 sec  
D20 0.00689655 sec  
TD0 1  
SFO1 125.7703643 MHz  
NUC1 13C  
P1 10.00 usec  
P2 20.00 usec  
PLW1 74.02700043 W  
SFO2 500.1320005 MHz  
NUC2 1H  
CPDPRG[2] waltz16  
PCPD2 80.00 usec  
PLW2 21.07600021 W  
PLW12 0.32931000 W

F2 - Processing parameters  
SI 32768  
SF 125.7577885 MHz  
WDW EM  
SSB 0  
LB 1.00 Hz  
GB 0  
PC 1.40

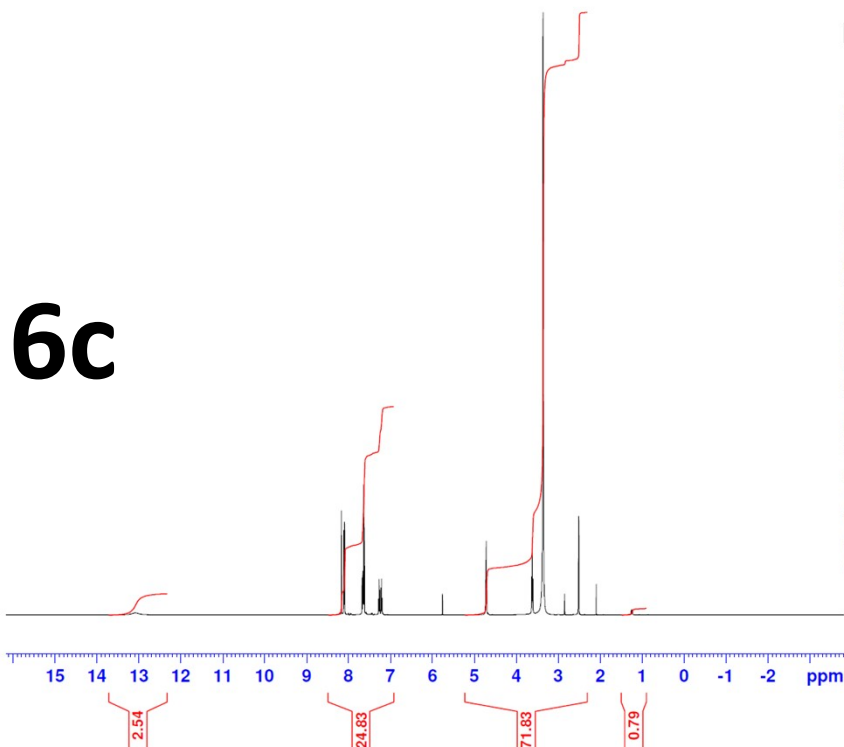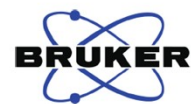

Current Data Parameters  
NAME NAl14  
EXPNO 1  
PROCNO 1

F2 - Acquisition Parameters  
Date\_ 20190904  
Time 16.58 h  
INSTRUM spect  
PROBHD Z113652\_0266 (   
PULPROG zg30  
TD 65536  
SOLVENT DMSO  
NS 16  
DS 2  
SWH 10000.000 Hz  
FIDRES 0.305176 Hz  
AQ 3.2767999 sec  
RG 91.87  
DW 50.000 usec  
DE 13.50 usec  
TE 298.1 K  
D1 1.00000000 sec  
TD0 1  
SFO1 500.1330883 MHz  
NUC1 1H  
P1 10.00 usec  
PLW1 21.07600021 W

F2 - Processing parameters  
SI 65536  
SF 500.1300000 MHz  
WDW EM  
SSB 0  
LB 0.30 Hz  
GB 0  
PC 1.00

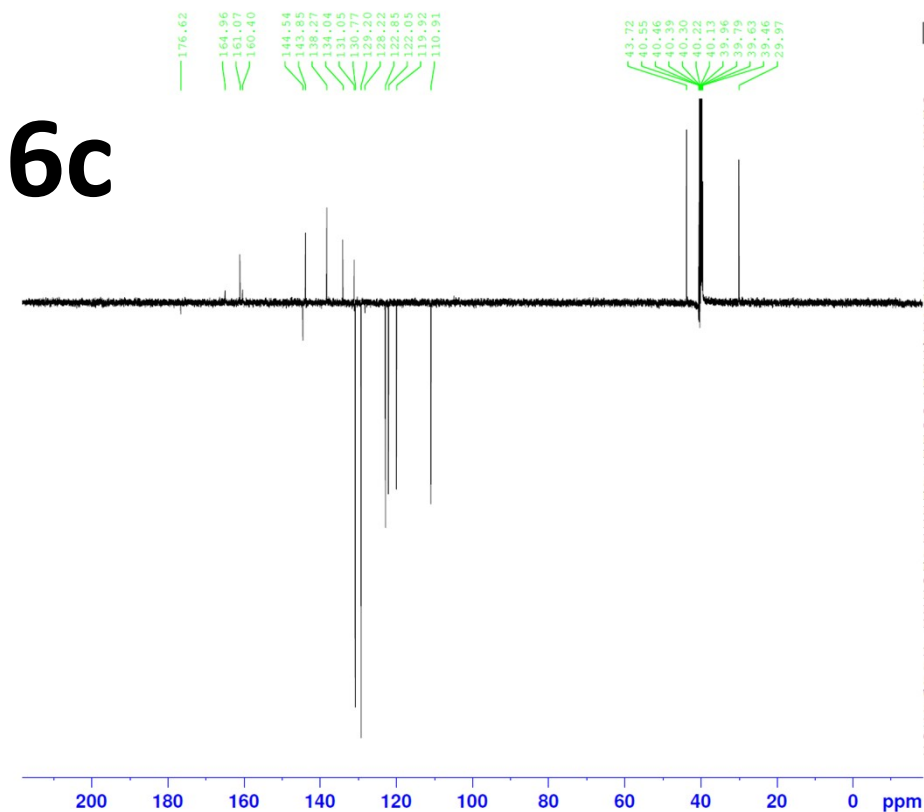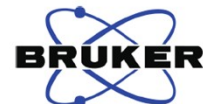

Current Data Parameters  
NAME NAl14  
EXPNO 3  
PROCNO 1

F2 - Acquisition Parameters  
Date\_ 20190906  
Time 21.31 h  
INSTRUM spect  
PROBHD Z113652\_0266 (   
PULPROG jmod  
TD 65536  
SOLVENT DMSO  
NS 1024  
DS 4  
SWH 29761.904 Hz  
FIDRES 0.908261 Hz  
AQ 1.1010048 sec  
RG 189.93  
DW 16.800 usec  
DE 6.50 usec  
TE 298.1 K  
CNST2 145.0000000  
CNST11 1.0000000  
D1 2.00000000 sec  
D20 0.00689655 sec  
TD0 1  
SFO1 125.7703643 MHz  
NUC1 13C  
P1 10.00 usec  
P2 20.00 usec  
PLW1 74.02700043 W  
SFO2 500.1320005 MHz  
NUC2 1H  
CPDPRG2 waltz16  
PCPD2 80.00 usec  
PLW2 21.07600021 W  
PLW12 0.32931000 W

F2 - Processing parameters  
SI 32768  
SF 125.7577885 MHz  
WDW EM  
SSB 0  
LB 1.00 Hz  
GB 0  
PC 1.40

6d

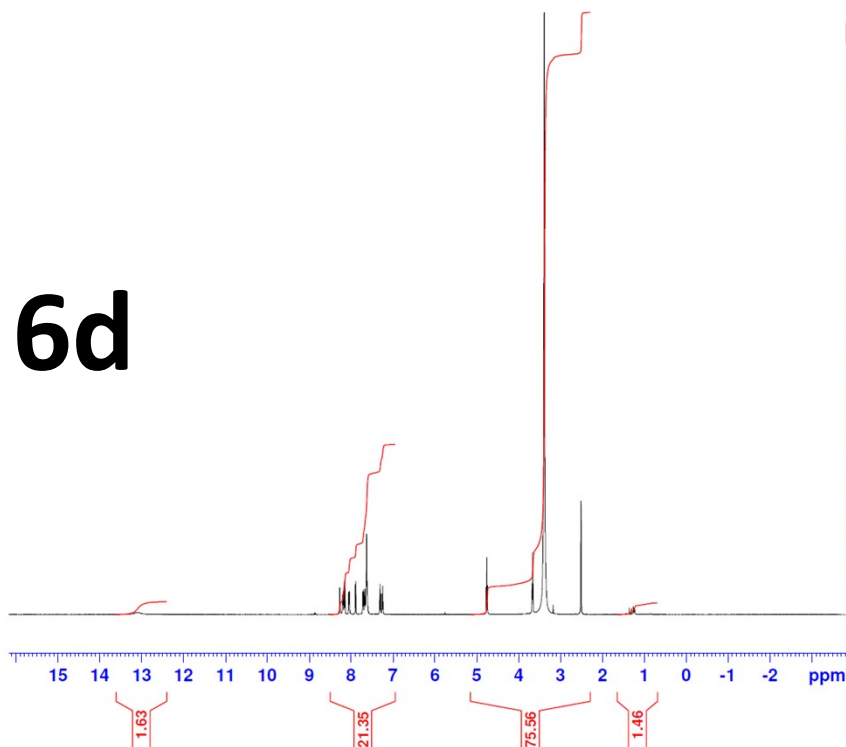

6d

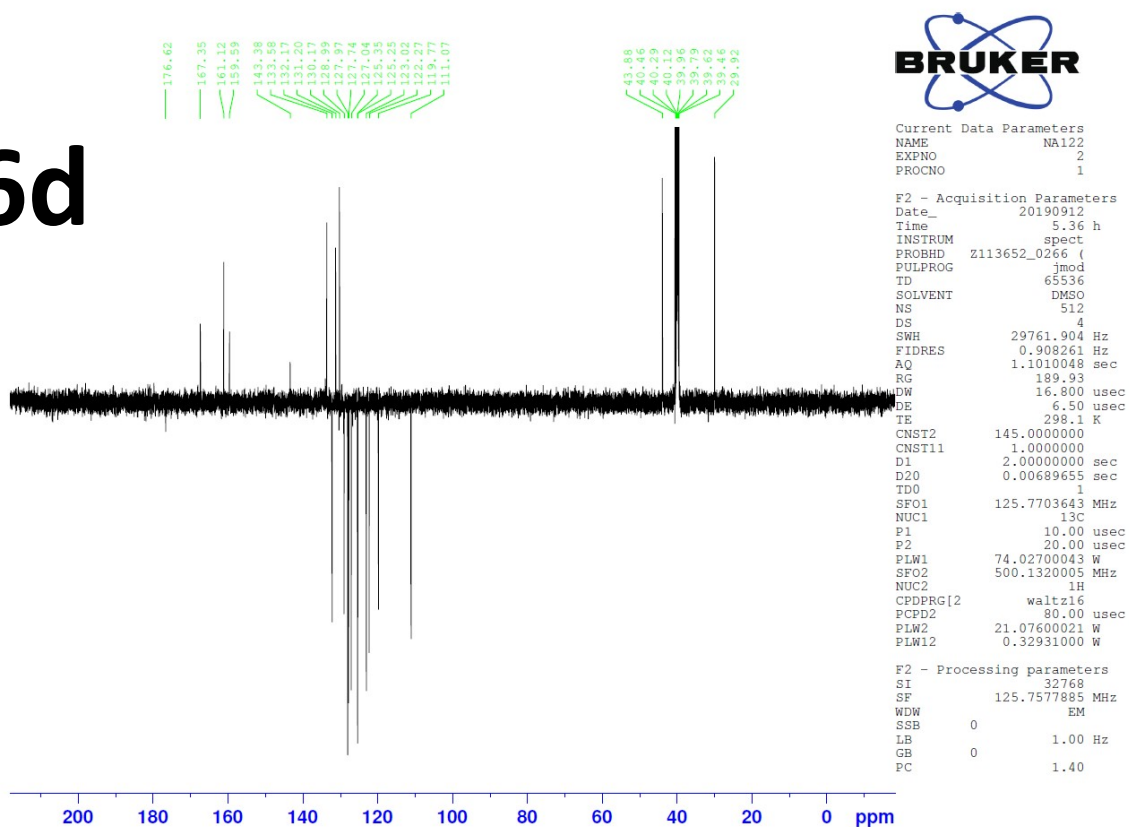



6e

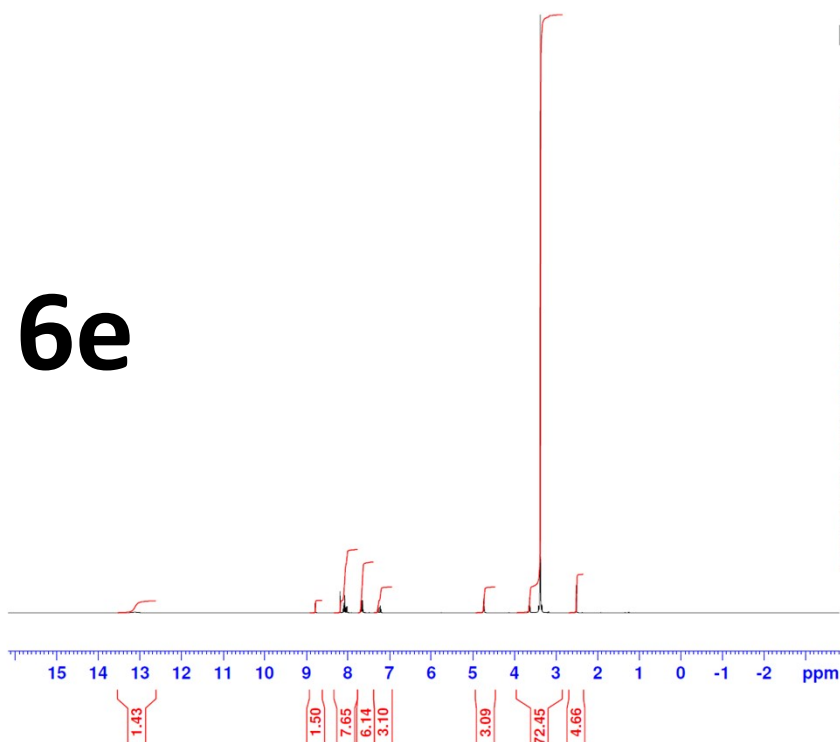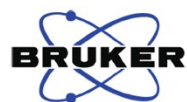

Current Data Parameters  
NAME NA121  
EXPNO 1  
PROCNO 1

F2 - Acquisition Parameters  
Date\_ 20190910  
Time 11.01 h  
INSTRUM spect  
PROBHD Z113652\_0266 (   
PULPROG zg30  
TD 65536  
SOLVENT DMSO  
NS 16  
DS 2  
SWH 10000.000 Hz  
FIDRES 0.305176 Hz  
AQ 3.2767999 sec  
RG 85.54  
DW 50.000 usec  
DE 13.50 usec  
TE 298.1 K  
D1 1.00000000 sec  
TD0 1  
SFO1 500.1330883 MHz  
NUC1 1H  
P1 10.00 usec  
PLW1 21.07600021 W

F2 - Processing parameters  
SI 65536  
SF 500.1300000 MHz  
WDW EM  
SSB 0  
LB 0.30 Hz  
GB 0  
PC 1.00

6e

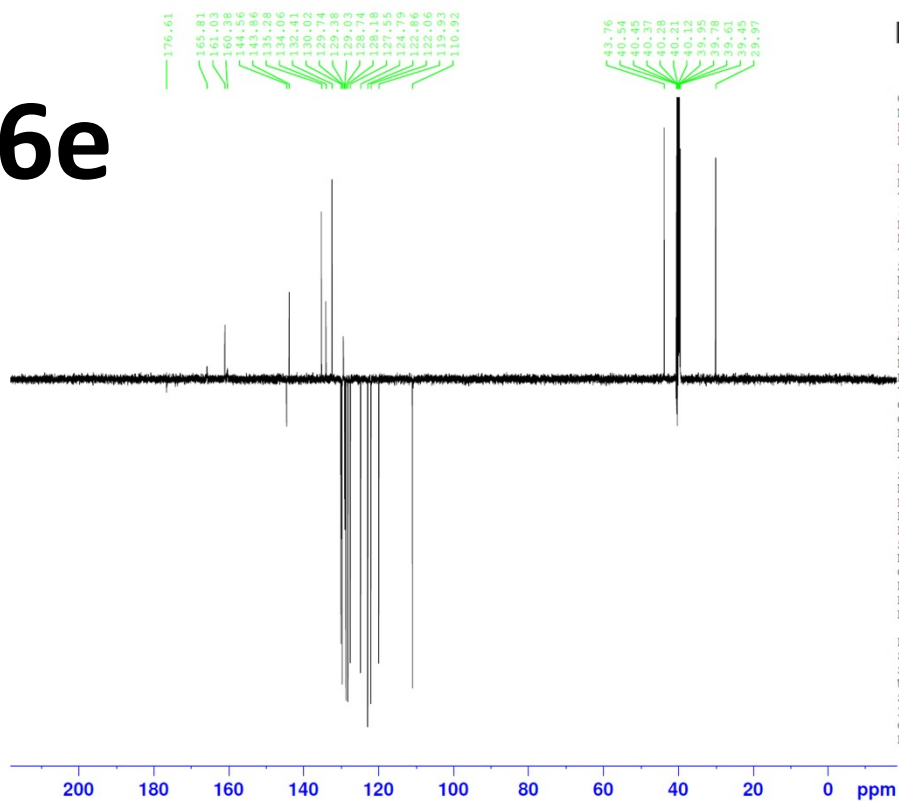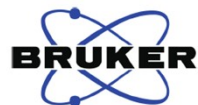

Current Data Parameters  
NAME NA121  
EXPNO 3  
PROCNO 1

F2 - Acquisition Parameters  
Date\_ 20190919  
Time 2.05 h  
INSTRUM spect  
PROBHD Z113652\_0266 (   
PULPROG jmod  
TD 65536  
SOLVENT DMSO  
NS 3072  
DS 4  
SWH 29761.904 Hz  
FIDRES 0.908261 Hz  
AQ 1.1010048 sec  
RG 189.93  
DW 16.800 usec  
DE 6.50 usec  
TE 298.1 K  
CNS12 145.0000000  
CNS11 1.0000000  
D1 2.00000000 sec  
D20 0.00689655 sec  
TD0 1  
SFO1 125.7703643 MHz  
NUC1 13C  
P1 10.00 usec  
P2 20.00 usec  
PLW1 74.02700043 W  
SFO2 500.1320005 MHz  
NUC2 1H  
CPDPRG2 waltz16  
PCPD2 80.00 usec  
PLW2 21.07600021 W  
PLW12 0.32931000 W

F2 - Processing parameters  
SI 32768  
SF 125.7577885 MHz  
WDW EM  
SSB 0  
LB 1.00 Hz  
GB 0  
PC 1.40



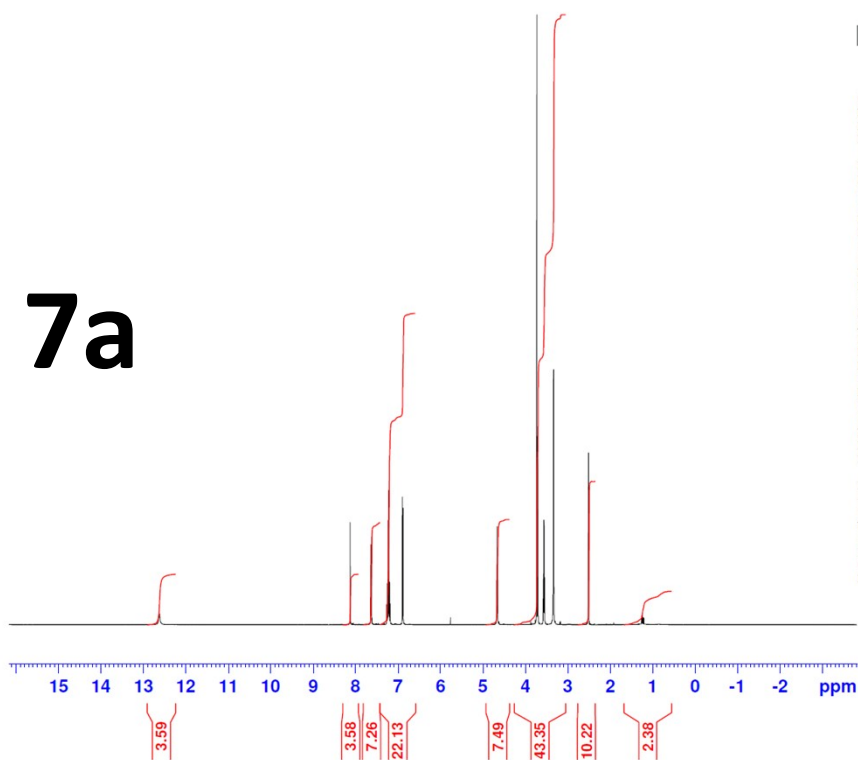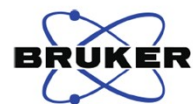

Current Data Parameters  
NAME NA124  
EXPNO 1  
PROCNO 1

F2 - Acquisition Parameters  
Date\_ 20190920  
Time 16.38 h  
INSTRUM spect  
PROBHD Z113652\_0266 (  
PULPROG zg30  
TD 65536  
SOLVENT DMSO  
NS 16  
DS 2  
SWH 10000.000 Hz  
FIDRES 0.305176 Hz  
AQ 3.2767999 sec  
RG 119.43  
DW 50.000 usec  
DE 13.50 usec  
TE 298.1 K  
D1 1.00000000 sec  
TD0 1  
SFO1 500.1330883 MHz  
NUC1 1H  
P1 10.00 usec  
PLW1 21.07600021 W

F2 - Processing parameters  
SI 65536  
SF 500.1300000 MHz  
WDW EM  
SSB 0  
LB 0.30 Hz  
GB 0  
PC 1.00

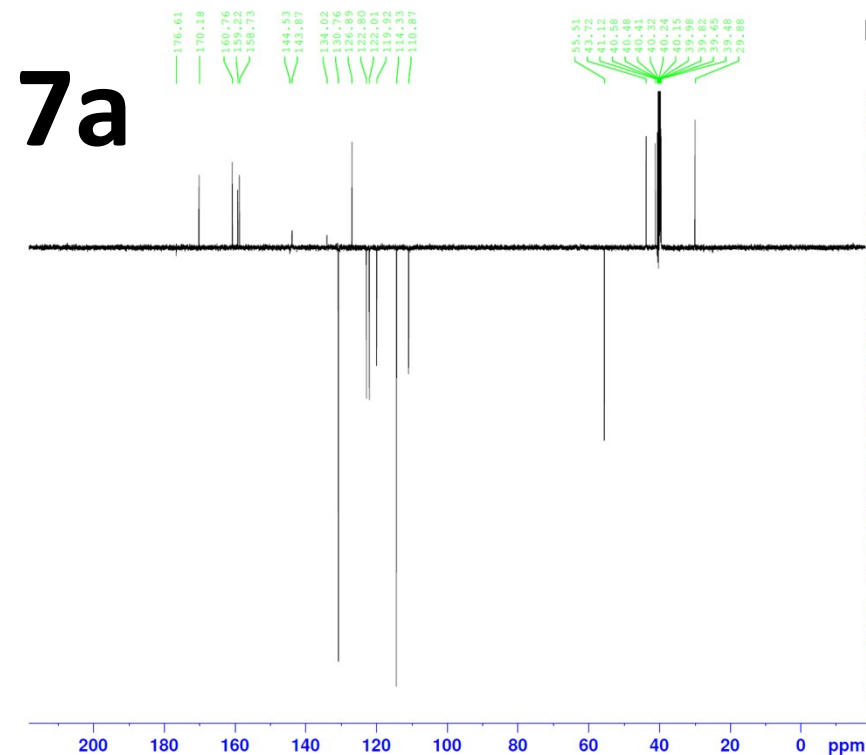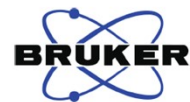

Current Data Parameters  
NAME NA124  
EXPNO 3  
PROCNO 1

F2 - Acquisition Parameters  
Date\_ 20191007  
Time 22.47 h  
INSTRUM spect  
PROBHD Z113652\_0266 (  
PULPROG jmod  
TD 65536  
SOLVENT DMSO  
NS 2048  
DS 4  
SWH 29761.904 Hz  
FIDRES 0.908261 Hz  
AQ 1.1010048 sec  
RG 189.93  
DW 16.800 usec  
DE 6.50 usec  
TE 298.2 K  
CNST2 145.0000000  
CNST11 1.0000000  
D1 2.00000000 sec  
D20 0.00689655 sec  
TD0 1  
SFO1 125.7703643 MHz  
NUC1 13C  
P1 10.00 usec  
P2 20.00 usec  
PLW1 74.02700043 W  
SFO2 500.1320005 MHz  
NUC2 1H  
CPDPRG[2] waltz16  
PCPD2 80.00 usec  
PLW2 21.07600021 W  
PLW12 0.32931000 W

F2 - Processing parameters  
SI 32768  
SF 125.7577885 MHz  
WDW EM  
SSB 0  
LB 1.00 Hz  
GB 0  
PC 1.40

7b

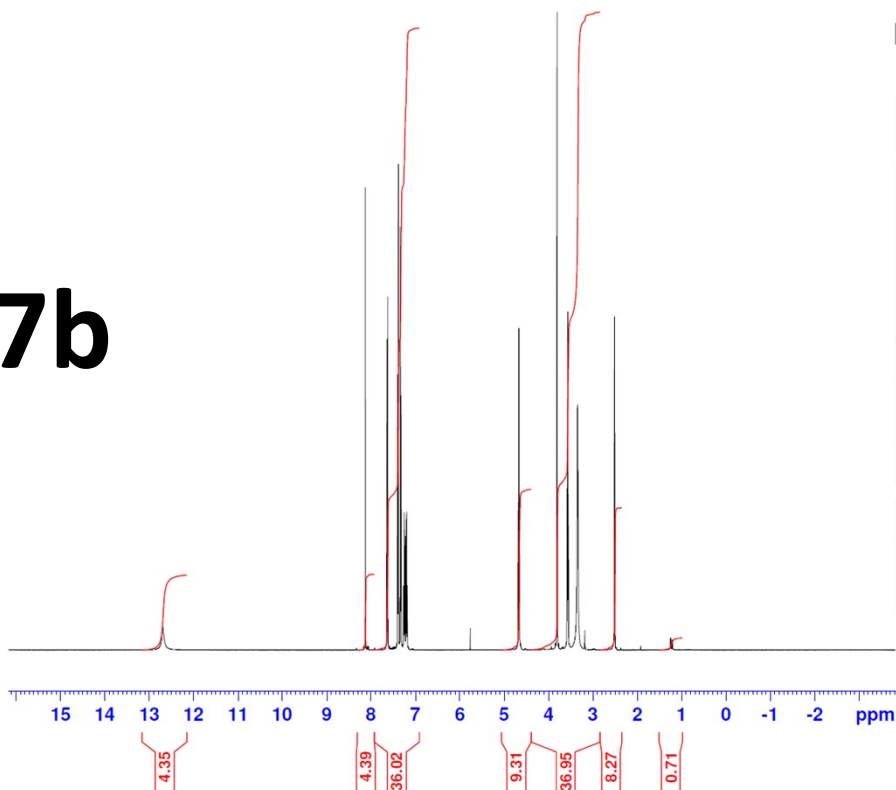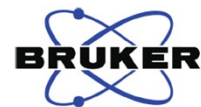

Current Data Parameters  
 NAME NA123  
 EXPNO 1  
 PROCNO 1

F2 - Acquisition Parameters  
 Date\_ 20190920  
 Time 15.54 h  
 INSTRUM spect  
 PROBHD Z113652\_0266 (zg30)  
 PULPROG 65536  
 TD 16  
 SOLVENT DMSO  
 NS 2  
 DS 10000.000 Hz  
 SWH 0.305176 Hz  
 FIDRES 3.2767999 sec  
 AQ 118.43  
 RG 50.000 usec  
 DW 13.50 usec  
 DE 298.1 K  
 TE 1.00000000 sec  
 D1 1  
 TD0 500.1330883 MHz  
 SFO1 1H  
 NUC1 10.00 usec  
 F1 21.07600021 W  
 PLW1

F2 - Processing parameters  
 SI 65536  
 SF 500.1300000 MHz  
 WDW EM  
 SSB 0  
 LB 0.30 Hz  
 GB 0  
 PC 1.00

7b

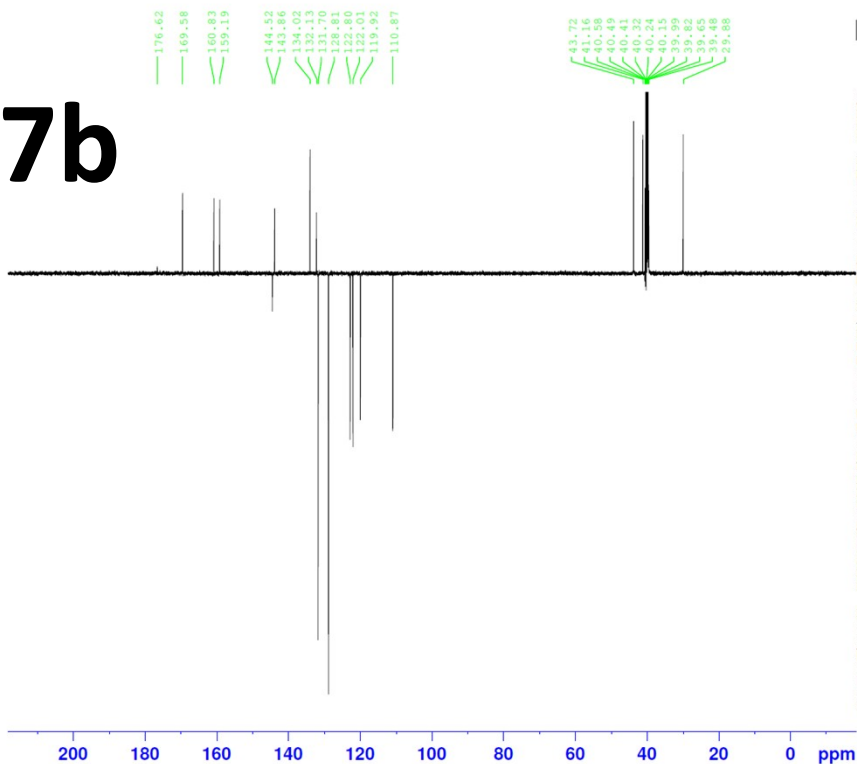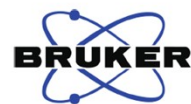

Current Data Parameters  
 NAME NA123  
 EXPNO 2  
 PROCNO 1

F2 - Acquisition Parameters  
 Date\_ 20191001  
 Time 23.45 h  
 INSTRUM spect  
 PROBHD Z113652\_0266 (jmod)  
 PULPROG 65536  
 TD 2048  
 SOLVENT DMSO  
 NS 4  
 DS 29761.904 Hz  
 SWH 0.908261 Hz  
 FIDRES 1.1010048 sec  
 AQ 189.93  
 RG 16.800 usec  
 DW 6.50 usec  
 DE 298.1 K  
 TE 145.0000000  
 CNST2 1.0000000  
 D1 2.00000000 sec  
 D20 0.00689655 sec  
 TD0 1  
 SFO1 125.7703643 MHz  
 NUC1 13C  
 P1 10.00 usec  
 P2 20.00 usec  
 PLW1 74.02700043 W  
 SFO2 500.1320005 MHz  
 NUC2 1H  
 CPDPRG2 waltz16  
 PCPD2 80.00 usec  
 PLW2 21.07600021 W  
 PLW12 0.32931000 W

F2 - Processing parameters  
 SI 32768  
 SF 125.7577885 MHz  
 WDW EM  
 SSB 0  
 LB 1.00 Hz  
 GB 0  
 PC 1.40

7c

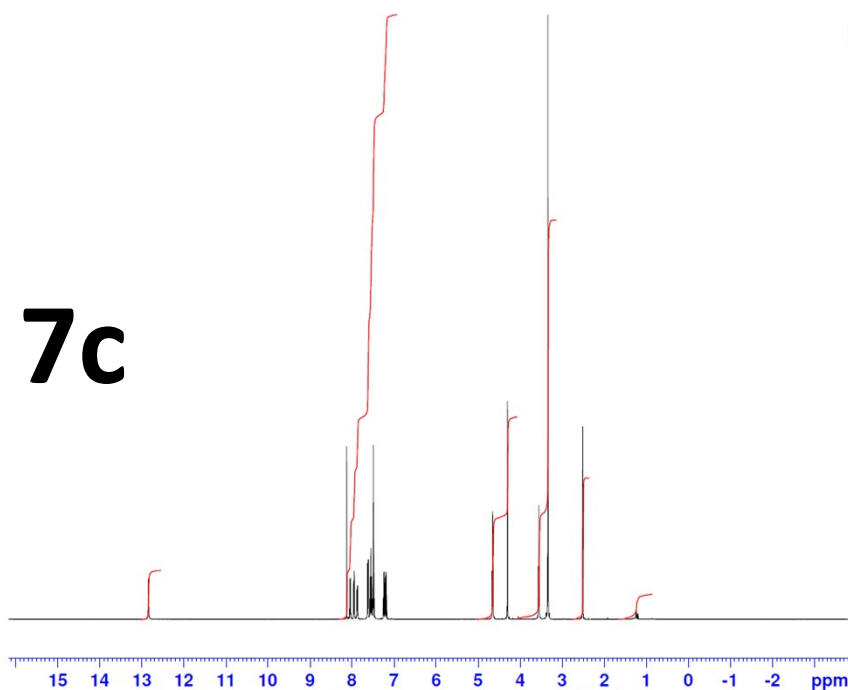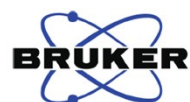

Current Data Parameters  
NAME NA126  
EXPNO 1  
PROCNO 1

F2 - Acquisition Parameters  
Date\_ 20191016  
Time 15.50 h  
INSTRUM spect  
PROBHD Z113652\_0266 (  
PULPROG zg30  
TD 65536  
SOLVENT DMSO  
NS 16  
DS 2  
SWH 10000.000 Hz  
FIDRES 0.305176 Hz  
AQ 3.2767999 sec  
RG 118.43  
DW 50.000 usec  
DE 13.50 usec  
TE 298.1 K  
D1 1.00000000 sec  
TD0 1  
SFO1 500.1330883 MHz  
NUC1 1H  
P1 10.00 usec  
PLW1 21.07600021 W

F2 - Processing parameters  
SI 65536  
SF 500.1300000 MHz  
WDW EM  
SSB 0  
LB 0.30 Hz  
GB 0  
PC 1.00

7c

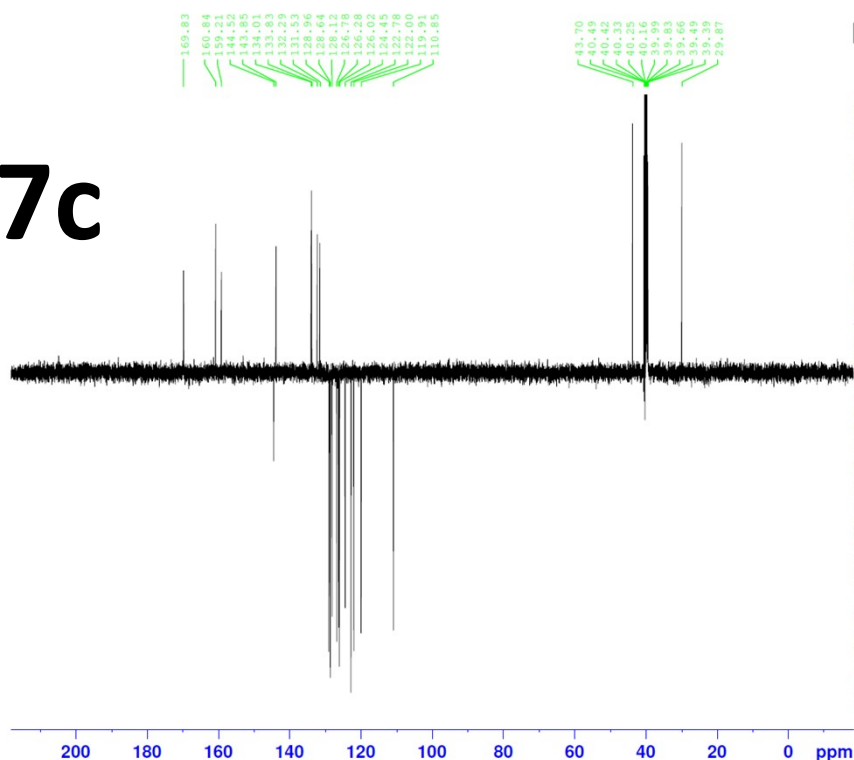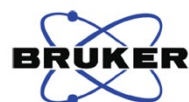

Current Data Parameters  
NAME NA126  
EXPNO 2  
PROCNO 1

F2 - Acquisition Parameters  
Date\_ 20191016  
Time 20.02 h  
INSTRUM spect  
PROBHD Z113652\_0266 (  
PULPROG jmod  
TD 65536  
SOLVENT DMSO  
NS 512  
DS 4  
SWH 29761.904 Hz  
FIDRES 0.908261 Hz  
AQ 1.1010048 sec  
RG 189.93  
DW 16.800 usec  
DE 6.50 usec  
TE 298.2 K  
CNST2 145.0000000  
CNST11 1.0000000  
D1 2.00000000 sec  
D20 0.00689655 sec  
TD0 1  
SFO1 125.7703643 MHz  
NUC1 13C  
P1 10.00 usec  
P2 20.00 usec  
PLW1 74.02700043 W  
SFO2 500.1320005 MHz  
NUC2 1H  
CPDPRG2 waltz16  
PCPD2 80.00 usec  
PLW2 21.07600021 W  
PLW12 0.32931000 W

F2 - Processing parameters  
SI 32768  
SF 125.7577885 MHz  
WDW EM  
SSB 0  
LB 1.00 Hz  
GB 0  
PC 1.40

7d

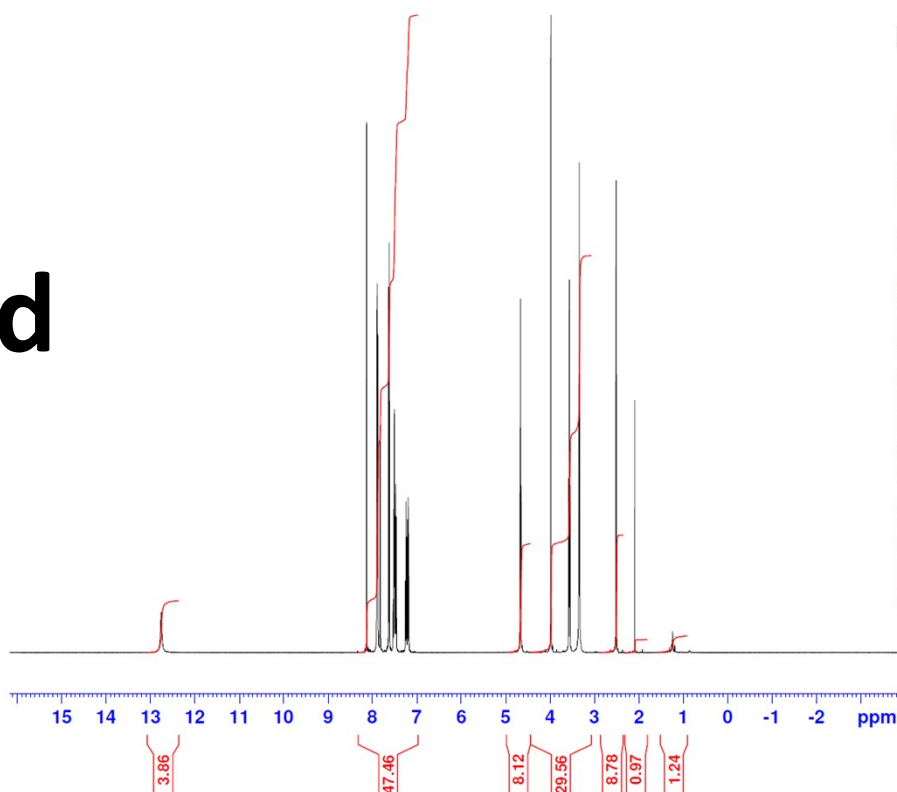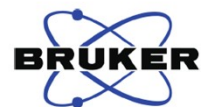

Current Data Parameters  
NAME NA125  
EXPNO 1  
PROCNO 1

F2 - Acquisition Parameters  
Date\_ 20191016  
Time 15.35 h  
INSTRUM spect  
PROBHD Z113652\_0266 ( )  
PULPROG zg30  
TD 65536  
SOLVENT DMSO  
NS 16  
DS 2  
SWH 10000.000 Hz  
FIDRES 0.305176 Hz  
AQ 3.2767999 sec  
RG 118.43  
DW 50.000 usec  
DE 13.50 usec  
TE 298.1 K  
D1 1.00000000 sec  
TD0 1  
SFO1 500.1330883 MHz  
NUC1 1H  
P1 10.00 usec  
PLW1 21.07600021 W

F2 - Processing parameters  
SI 65536  
SF 500.1300000 MHz  
WDW EM  
SSB 0  
LB 0.30 Hz  
GB 0  
PC 1.00

7d

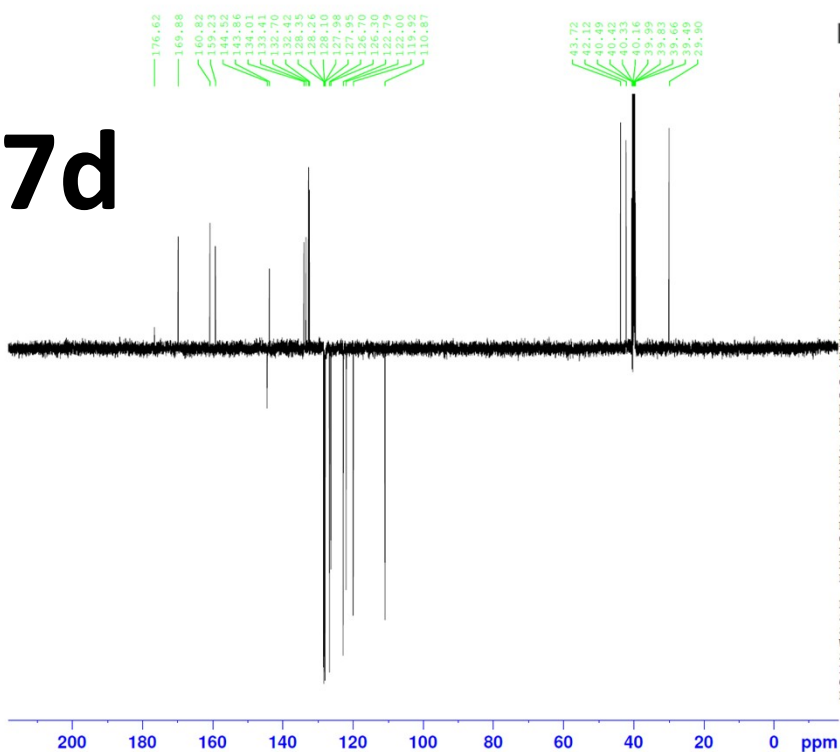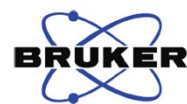

Current Data Parameters  
NAME NA125  
EXPNO 2  
PROCNO 1

F2 - Acquisition Parameters  
Date\_ 20191016  
Time 19.32 h  
INSTRUM spect  
PROBHD Z113652\_0266 ( )  
PULPROG jmod  
TD 65536  
SOLVENT DMSO  
NS 512  
DS 4  
SWH 29761.904 Hz  
FIDRES 0.908261 Hz  
AQ 1.1010048 sec  
RG 189.93  
DW 16.800 usec  
DE 6.50 usec  
TE 298.2 K  
CNST2 145.0000000  
CNST11 1.0000000  
D1 2.00000000 sec  
D20 0.00689655 sec  
TD0 1  
SFO1 125.7703643 MHz  
NUC1 13C  
P1 10.00 usec  
P2 20.00 usec  
PLW1 74.02700043 W  
SFO2 500.1320005 MHz  
NUC2 1H  
CPDPRG2 waltz16  
PCPD2 80.00 usec  
PLW2 21.07600021 W  
PLW12 0.32931000 W

F2 - Processing parameters  
SI 32768  
SF 125.7577885 MHz  
WDW EM  
SSB 0  
LB 1.00 Hz  
GB 0  
PC 1.40

9a

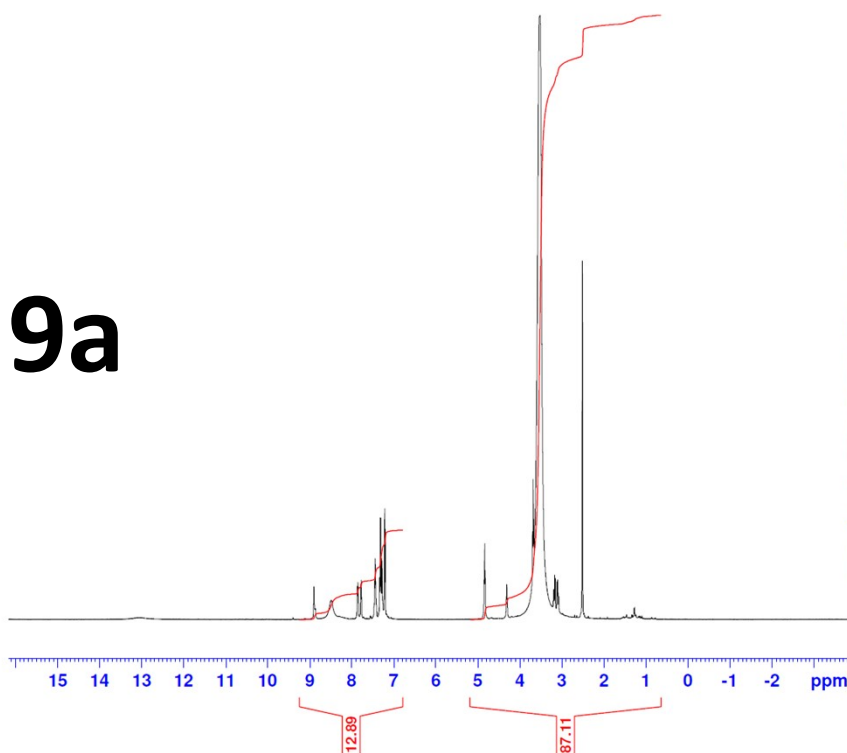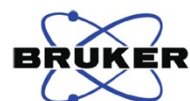

Current Data Parameters  
 NAME NA110 melted  
 EXPNO 1  
 PROCNO 1

F2 - Acquisition Parameters  
 Date\_ 20190809  
 Time 11.27 h  
 INSTRUM spect  
 PROBHD Z113652\_0266 (Zg30  
 PULPROG 65536  
 TD 16  
 SOLVENT DMSO  
 NS 2  
 DS 10000.000 Hz  
 SWH 0.305176 Hz  
 FIDRES 3.2767999 sec  
 AQ 76.2  
 RG 50.000 usec  
 DW 13.50 usec  
 DE 298.1 K  
 TE 1.00000000 sec  
 D1 1  
 TD0 500.1330883 MHz  
 SFO1 1H  
 NUC1 10.00 usec  
 P1 21.07600021 W  
 PLW1

F2 - Processing parameters  
 SI 65536  
 SF 500.1300000 MHz  
 WDW EM  
 SSB 0  
 LB 0.30 Hz  
 GB 0  
 PC 1.00

9a

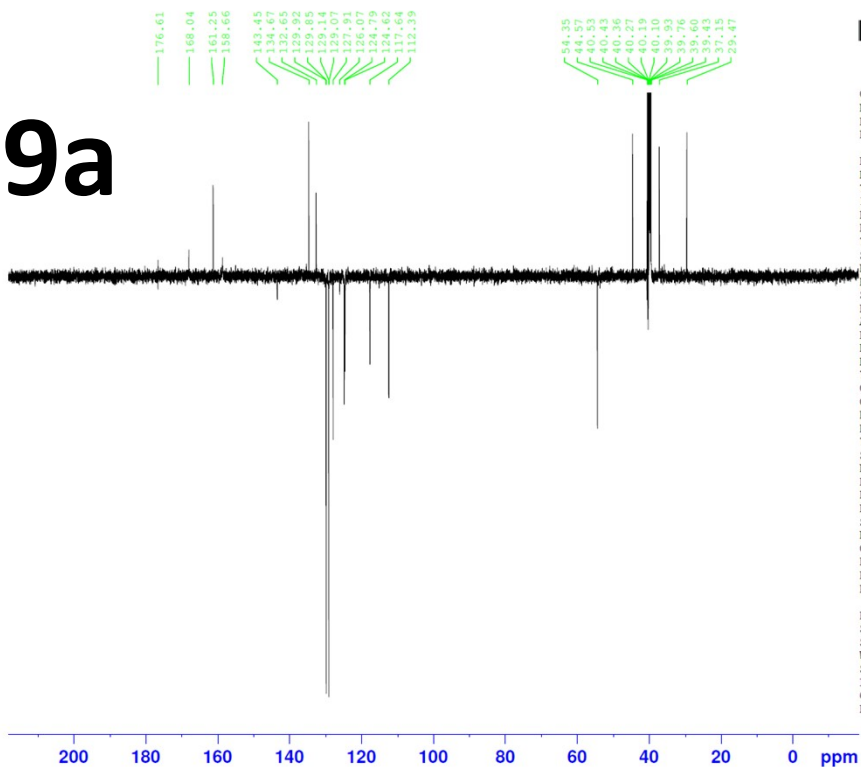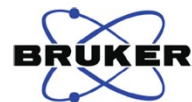

Current Data Parameters  
 NAME NA110  
 EXPNO 5  
 PROCNO 1

F2 - Acquisition Parameters  
 Date\_ 20190821  
 Time 1.03 h  
 INSTRUM spect  
 PROBHD Z113652\_0266 (jmod  
 PULPROG 65536  
 TD 3072  
 SOLVENT DMSO  
 NS 4  
 DS 29761.904 Hz  
 SWH 0.908261 Hz  
 FIDRES 1.1010048 sec  
 AQ 189.93  
 RG 16.800 usec  
 DW 6.50 usec  
 DE 298.1 K  
 TE 145.0000000  
 CNST1 1.0000000  
 D1 2.00000000 sec  
 D20 0.00689655 sec  
 TD0 1  
 SFO1 125.7703643 MHz  
 NUC1 13C  
 P1 10.00 usec  
 P2 20.00 usec  
 PLW1 74.02700043 W  
 SFO2 500.1320005 MHz  
 NUC2 1H  
 CPDPRG2 waltz16  
 PCPD2 80.00 usec  
 PLW2 21.07600021 W  
 PLW12 0.32931000 W

F2 - Processing parameters  
 SI 32768  
 SF 125.7577885 MHz  
 WDW EM  
 SSB 0  
 LB 1.00 Hz  
 GB 0  
 PC 1.40

9b

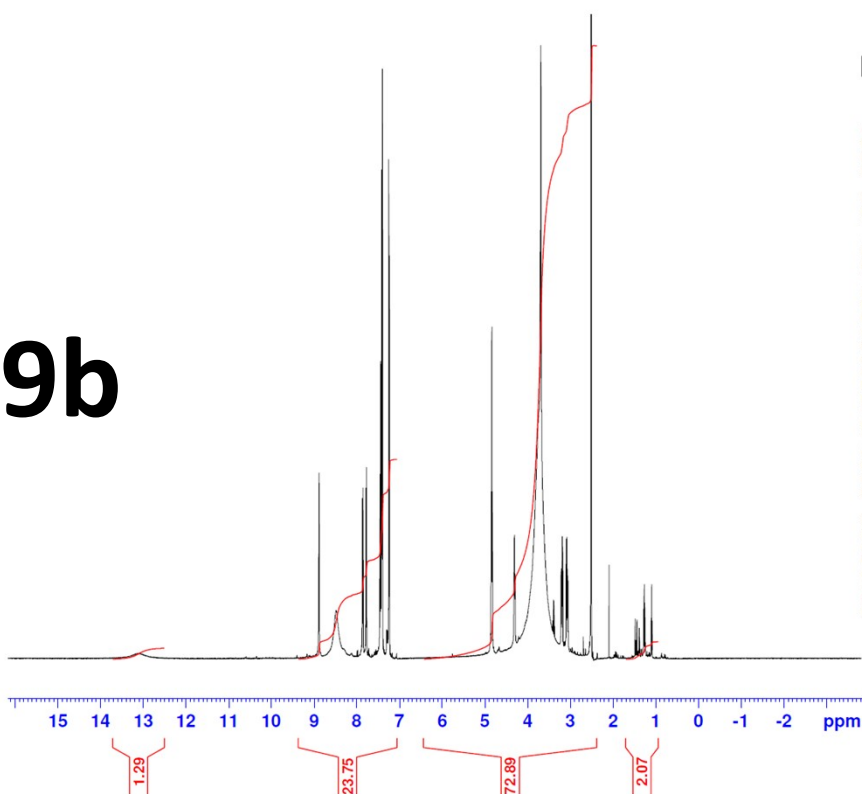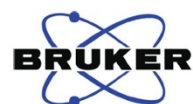

Current Data Parameters  
NAME NAl18  
EXPNO 1  
PROCNO 1

F2 - Acquisition Parameters  
Date\_ 20190904  
Time 16.53 h  
INSTRUM spect  
PROBHD Z113652\_0266 ( )  
PULPROG zg30  
TD 65536  
SOLVENT DMSO  
NS 16  
DS 2  
SWH 10000.000 Hz  
FIDRES 0.305176 Hz  
AQ 3.2767999 sec  
RG 104.67  
DW 50.000 usec  
DE 13.50 usec  
TE 298.1 K  
D1 1.00000000 sec  
TD0 1  
SFO1 500.1330883 MHz  
NUC1 1H  
P1 10.00 usec  
PLW1 21.07600021 W

F2 - Processing parameters  
SI 65536  
SF 500.1300000 MHz  
WDW EM  
SSB 0  
LB 0.30 Hz  
GB 0  
PC 1.00

9b

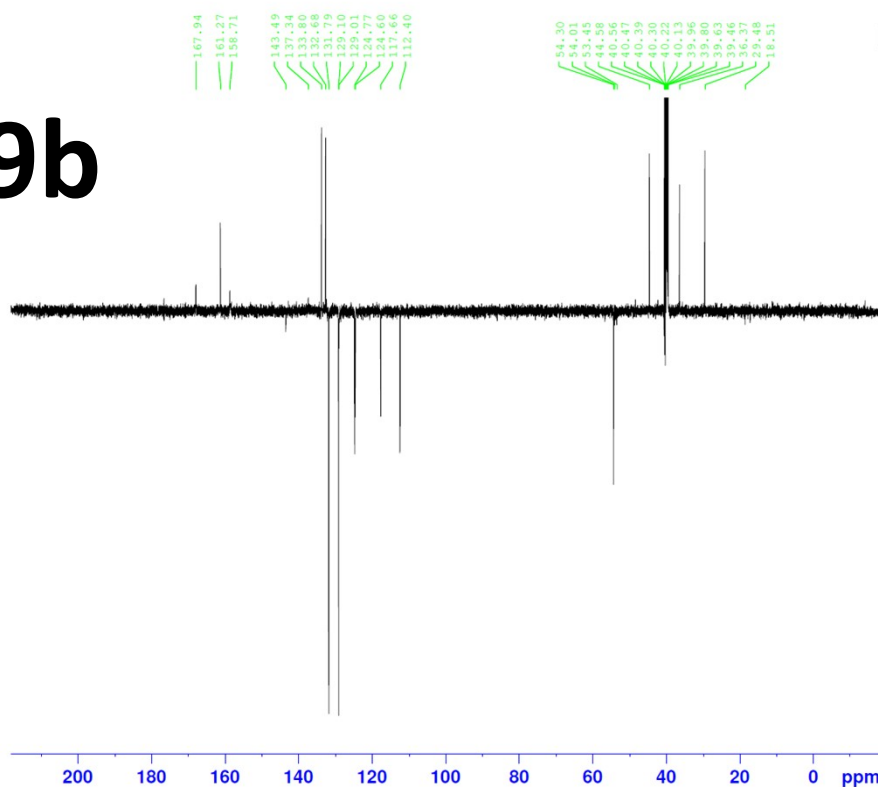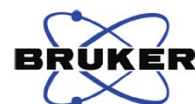

Current Data Parameters  
NAME NAl18  
EXPNO 5  
PROCNO 1

F2 - Acquisition Parameters  
Date\_ 20190914  
Time 3.47 h  
INSTRUM spect  
PROBHD Z113652\_0266 ( )  
PULPROG jmod  
TD 65536  
SOLVENT DMSO  
NS 3072  
DS 4  
SWH 29761.904 Hz  
FIDRES 0.908261 Hz  
AQ 1.1010048 sec  
RG 189.93  
DW 16.800 usec  
DE 6.50 usec  
TE 298.2 K  
CNST2 145.0000000  
CNST11 1.00000000  
D1 2.00000000 sec  
D20 0.00689655 sec  
TD0 1  
SFO1 125.7703643 MHz  
NUC1 13C  
P1 10.00 usec  
F2 20.00 usec  
PLW1 74.02700043 W  
SFO2 500.1320005 MHz  
NUC2 1H  
CPDPRG2 waltz16  
PCPD2 80.00 usec  
PLW2 21.07600021 W  
PLW12 0.32931000 W

F2 - Processing parameters  
SI 32768  
SF 125.7577885 MHz  
WDW EM  
SSB 0  
LB 1.00 Hz  
GB 0  
PC 1.40



9c

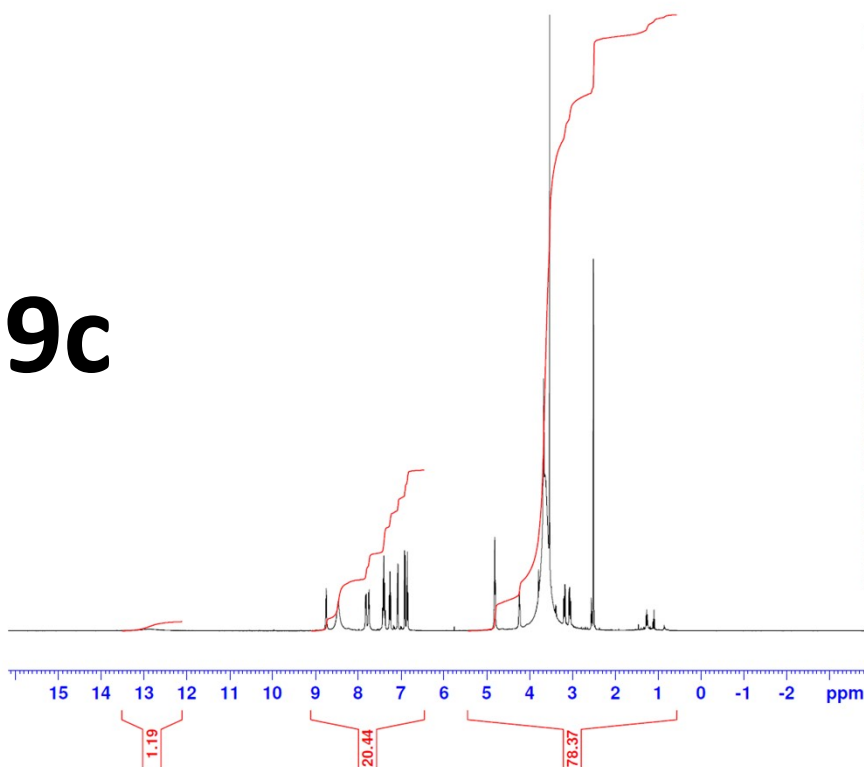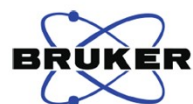

Current Data Parameters  
NAME NA119  
EXPNO 1  
PROCNO 1

F2 - Acquisition Parameters  
Date\_ 20190910  
Time 10.49 h  
INSTRUM spect  
PROBHD Z113652\_0266 (  
PULPROG zg30  
TD 65536  
SOLVENT DMSO  
NS 16  
DS 2  
SWH 10000.000 Hz  
FIDRES 0.305176 Hz  
AQ 3.2767999 sec  
RG 91.87  
DW 50.000 usec  
DE 13.50 usec  
TE 298.1 K  
D1 1.00000000 sec  
TD0 1  
SFO1 500.1330883 MHz  
NUC1 1H  
P1 10.00 usec  
PLW1 21.07600021 W

F2 - Processing parameters  
SI 65536  
SF 500.1300000 MHz  
WDW EM  
SSB 0  
LB 0.30 Hz  
GB 0  
PC 1.00

9c

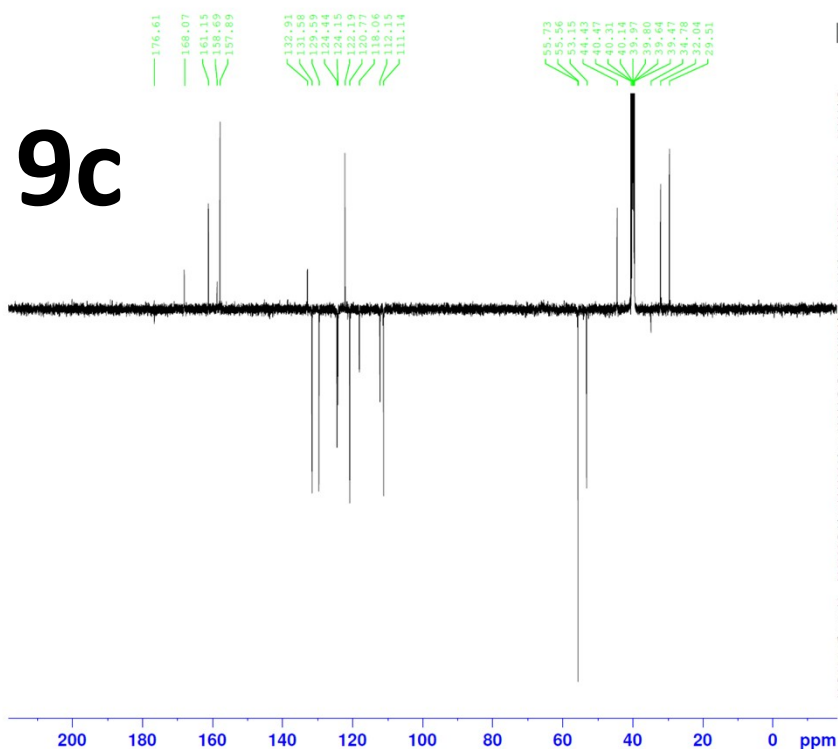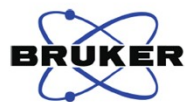

Current Data Parameters  
NAME NA119  
EXPNO 3  
PROCNO 1

F2 - Acquisition Parameters  
Date\_ 20190918  
Time 1.36 h  
INSTRUM spect  
PROBHD Z113652\_0266 (  
PULPROG jmod  
TD 65536  
SOLVENT DMSO  
NS 3072  
DS 4  
SWH 29761.904 Hz  
FIDRES 0.908261 Hz  
AQ 1.1010048 sec  
RG 189.93  
DW 16.800 usec  
DE 6.50 usec  
TE 298.2 K  
CNST2 145.0000000  
CNST11 1.0000000  
D1 2.00000000 sec  
D20 0.00689655 sec  
TD0 1  
SFO1 125.7703643 MHz  
NUC1 13C  
P1 10.00 usec  
P2 20.00 usec  
PLW1 74.02700043 W  
SFO2 500.1320005 MHz  
NUC2 1H  
CPDPRG2 waltz16  
PCPD2 80.00 usec  
PLW2 21.07600021 W  
PLW12 0.32931000 W

F2 - Processing parameters  
SI 32768  
SF 125.7577885 MHz  
WDW EM  
SSB 0  
LB 1.00 Hz  
GB 0  
PC 1.40

9d

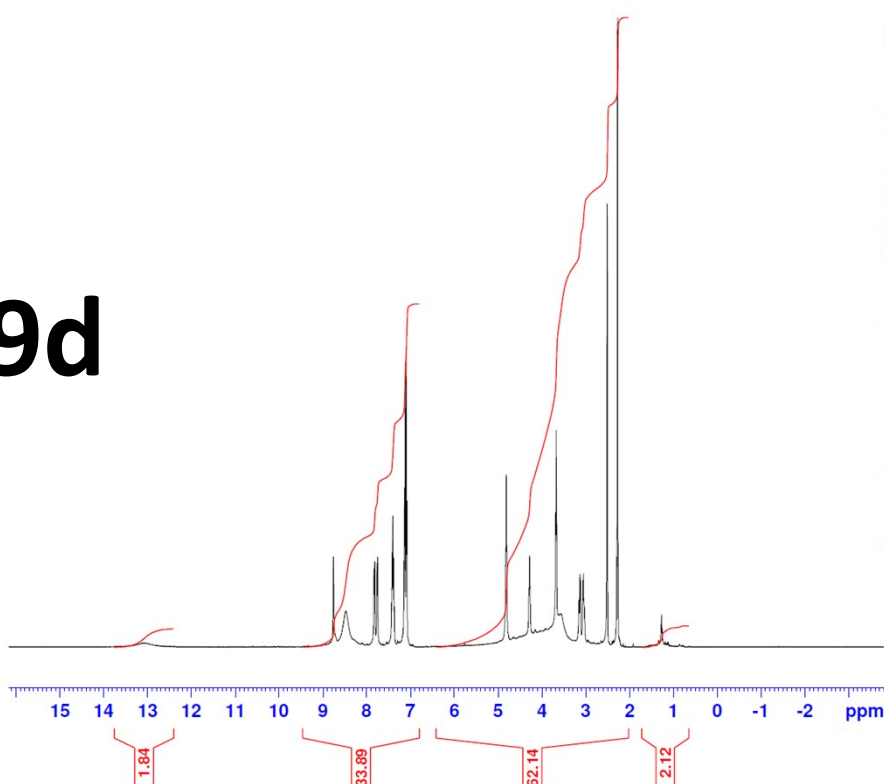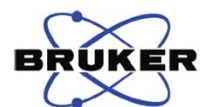

Current Data Parameters  
 NAME NA128  
 EXPNO 1  
 PROCNO 1

F2 - Acquisition Parameters  
 Date\_ 20190920  
 Time 16.44 h  
 INSTRUM spect  
 PROBHD Z113652\_0266 ( )  
 PULPROG zg30  
 TD 65536  
 SOLVENT DMSO  
 NS 16  
 DS 2  
 SWH 10000.000 Hz  
 FIDRES 0.305176 Hz  
 AQ 3.2767999 sec  
 RG 104.67  
 DW 50.000 usec  
 DE 13.50 usec  
 TE 298.1 K  
 D1 1.0000000 sec  
 TD0 1  
 SFO1 500.1330883 MHz  
 NUC1 1H  
 P1 10.00 usec  
 PLW1 21.07600021 W

F2 - Processing parameters  
 SI 65536  
 SF 500.1300000 MHz  
 WDW EM  
 SSB 0  
 LB 0.30 Hz  
 GB 0  
 PC 1.00

9d

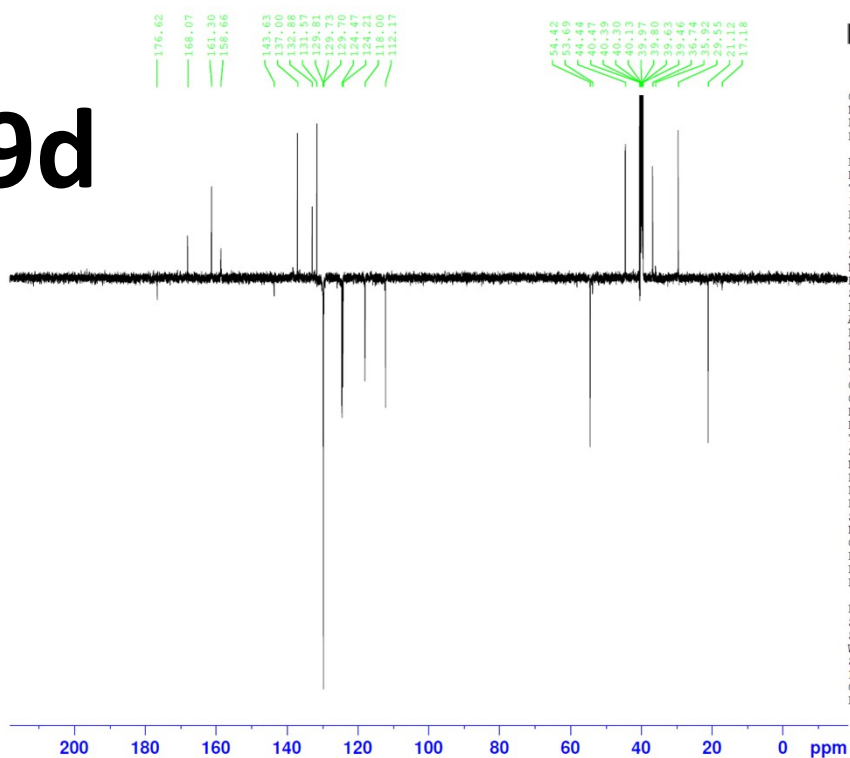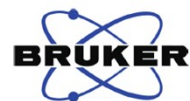

Current Data Parameters  
 NAME NA128  
 EXPNO 3  
 PROCNO 1

F2 - Acquisition Parameters  
 Date\_ 20191008  
 Time 1.33 h  
 INSTRUM spect  
 PROBHD Z113652\_0266 ( )  
 PULPROG jmod  
 TD 65536  
 SOLVENT DMSO  
 NS 3072  
 DS 4  
 SWH 29761.904 Hz  
 FIDRES 0.908261 Hz  
 AQ 1.1010048 sec  
 RG 189.93  
 DW 16.800 usec  
 DE 6.50 usec  
 TE 298.1 K  
 CNST2 145.0000000  
 CNST11 1.0000000  
 D1 2.0000000 sec  
 D20 0.00689655 sec  
 TD0 1  
 SFO1 125.7703643 MHz  
 NUC1 13C  
 P1 10.00 usec  
 P2 20.00 usec  
 PLW1 74.02700043 W  
 SFO2 500.1320005 MHz  
 NUC2 1H  
 CPDPRG2 waltz16  
 PCPD2 80.00 usec  
 PLW2 21.07600021 W  
 PLW12 0.32931000 W

F2 - Processing parameters  
 SI 32768  
 SF 125.7577885 MHz  
 WDW EM  
 SSB 0  
 LB 1.00 Hz  
 GB 0  
 PC 1.40



9d

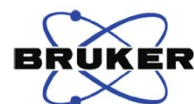

Current Data Parameters  
NAME NA128  
EXPNO 2  
PROCNO 1

F2 - Acquisition Parameters  
Date\_ 20191009  
Time 1.36 h  
INSTRUM spect  
PROBHD 513652\_0246 f  
PULPROG zgpg30  
TD 65536  
SOLVENT DMSO  
NS 2  
DS 2  
SWH 6480.306 Hz  
FIDRES 6.341315 Hz  
AQ 0.191660 sec  
RG 189.93  
RW 77.000 usec  
DE 6.90 usec  
TE 300.2 K  
CMT2 149.0000000  
CMT11 -0.0000000  
D0 0.0000300 sec  
D1 1.0000000 sec  
D11 0.00172414 sec  
D14 0.0000000 sec  
D16 0.0000000 sec  
D18 0.0000000 sec  
IN0 0.0000410 sec  
TD0 500.132304 MHz  
NUC1 1H  
P1 10.00 usec  
P2 20.00 usec  
P2A 0 usec  
P2B 11.07600021 W  
P2C 125.7672204 MHz  
P2D 13C  
CPCPRG2 gpg30  
P3 10.00 usec  
P4 500.00 usec  
P4A 2000.00 usec  
PCPD2 70.00 usec  
PMA0 0 W  
PMA2 74.02700043 W  
PMA12 1.51069999 W  
SPRAME3 Cpr60, 0.5, 20.1  
SPOAL3 0 Hz  
SPW3 11.31000042 W  
SPRAME7 Cpr50000, 4  
SPOAL7 0 Hz  
SPW7 11.31000042 W  
GPRAME11 ENDQ15, 100  
GPR1 80.00 Hz  
GPRAME12 ENDQ15, 100  
GPR2 20.10 Hz  
GPRAME13 ENDQ15, 100  
GPR3 11.00 Hz  
GPRAME14 ENDQ15, 100 Hz  
GPR4 1000.00 usec  
P16 600.00 usec  
P19 0 Hz

F1 - Acquisition parameters  
TD 294  
SF01 125.767170 MHz  
FIDRES 162.095048 Hz  
SW 144.862 ppm  
FPMODE Echo-AntiEcho

F2 - Processing parameters  
SI 3274  
SF 500.130000 MHz  
WDW QFTUNE  
SSB 2  
LB 0 Hz  
GB 0  
PC 1.40

F1 - Processing parameters  
SI 3274  
MC2 echo-anti-echo  
SF 125.7577880 MHz  
WDW QFTUNE  
SSB 2  
LB 0 Hz  
GB 0

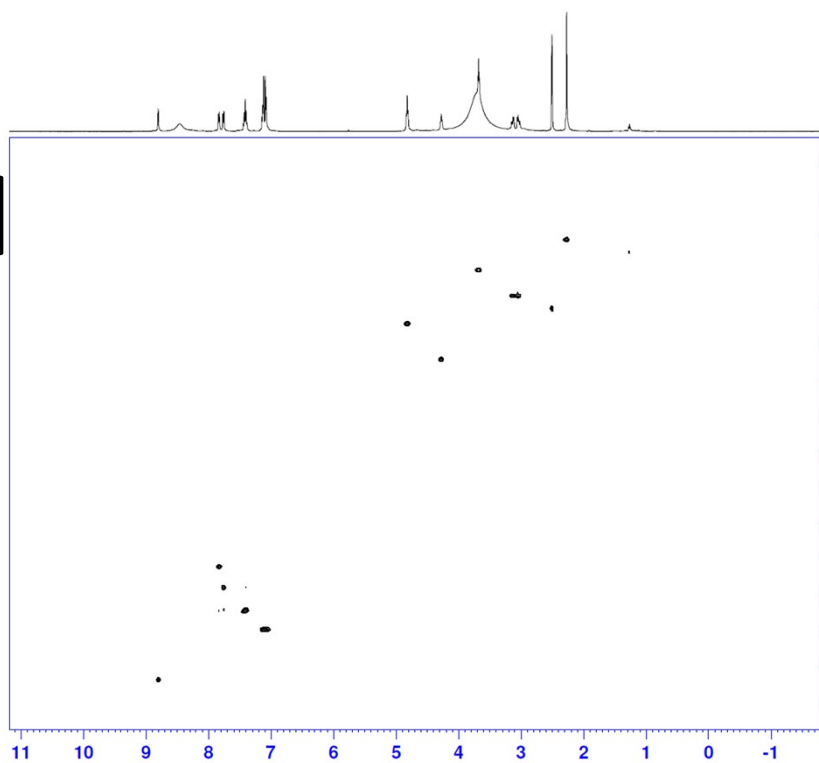

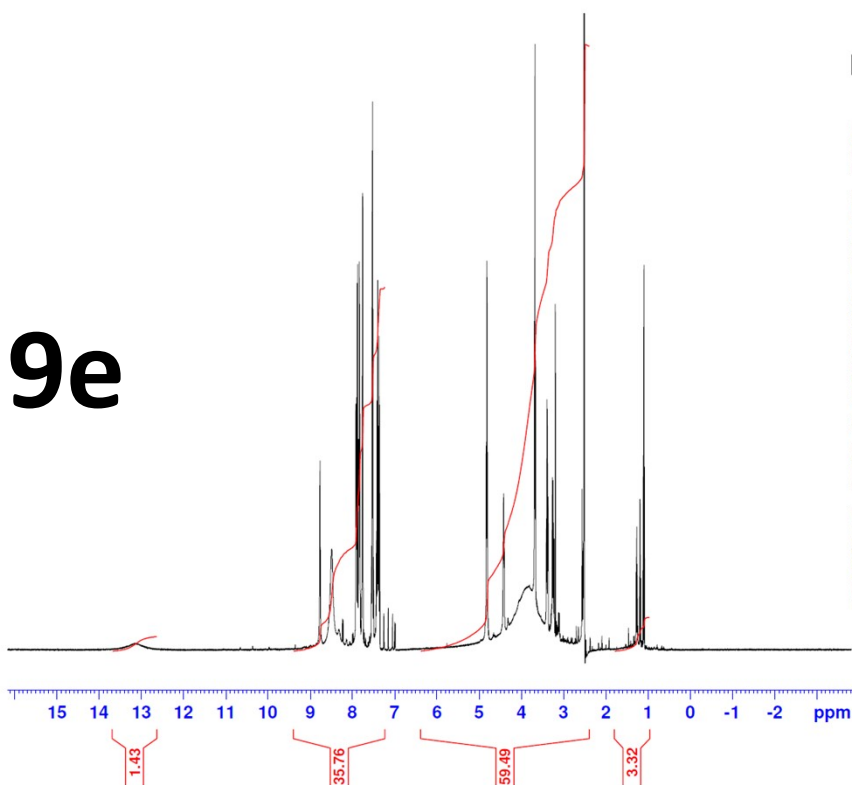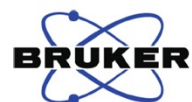

Current Data Parameters  
 NAME NA120 repeat  
 EXPNO 1  
 PROCNO 1

F2 - Acquisition Parameters  
 Date\_ 20200219  
 Time 18.16 h  
 INSTRUM spect  
 PROBHD Z113652\_0266 ( )  
 PULPROG zg30  
 TD 65536  
 SOLVENT DMSO  
 NS 16  
 DS 2  
 SWH 10000.000 Hz  
 FIDRES 0.305176 Hz  
 AQ 3.2767999 sec  
 RG 133.44  
 DW 50.000 usec  
 DE 13.50 usec  
 TE 298.1 K  
 D1 1.00000000 sec  
 TD0 1  
 SFO1 500.1330883 MHz  
 NUC1 1H  
 P1 10.00 usec  
 PLW1 21.07600021 W

F2 - Processing parameters  
 SI 65536  
 SF 500.1300000 MHz  
 WDW EM  
 SSB 0  
 LB 0.30 Hz  
 GB 0  
 PC 1.00

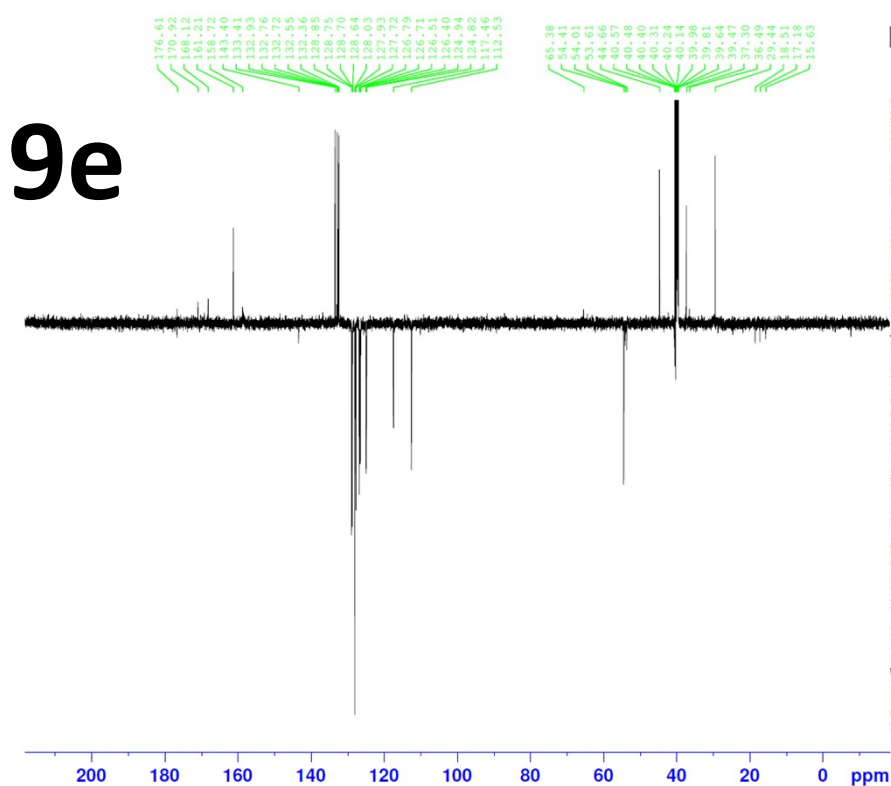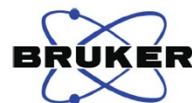

Current Data Parameters  
 NAME NA120  
 EXPNO 3  
 PROCNO 1

F2 - Acquisition Parameters  
 Date\_ 20190918  
 Time 4.21 h  
 INSTRUM spect  
 PROBHD Z113652\_0266 ( )  
 PULPROG jmod  
 TD 65536  
 SOLVENT DMSO  
 NS 3072  
 DS 4  
 SWH 29761.904 Hz  
 FIDRES 0.908261 Hz  
 AQ 1.1010048 sec  
 RG 189.93  
 DW 16.800 usec  
 DE 6.50 usec  
 TE 298.2 K  
 CNST2 145.0000000  
 CNST11 1.00000000  
 D1 2.00000000 sec  
 D20 0.00689655 sec  
 TD0 1  
 SFO1 125.7703643 MHz  
 NUC1 13C  
 P1 10.00 usec  
 P2 20.00 usec  
 PLW1 74.02700043 W  
 SFO2 500.1320005 MHz  
 NUC2 1H  
 CPDPRG2 waltz16  
 PCPD2 80.00 usec  
 PLW2 21.07600021 W  
 PLW12 0.32931000 W

F2 - Processing parameters  
 SI 32768  
 SF 125.7577885 MHz  
 WDW EM  
 SSB 0  
 LB 1.00 Hz  
 GB 0  
 PC 1.40

# 16a

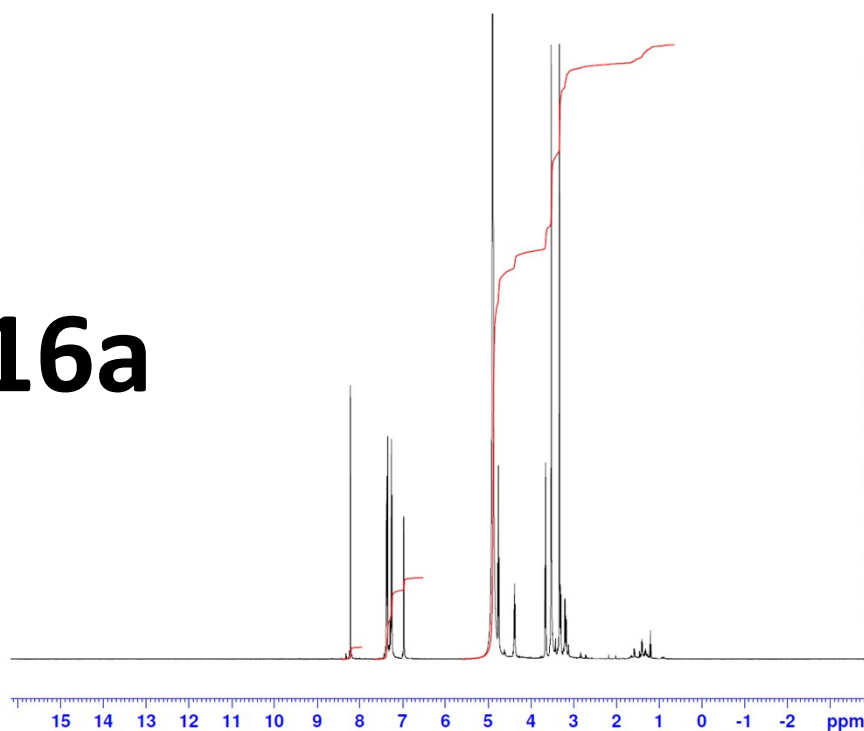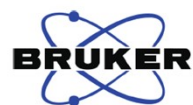

Current Data Parameters  
NAME NA1111 MeOD  
EXPNO 1  
PROCNO 1

F2 - Acquisition Parameters  
Date\_ 20200226  
Time 16.13 h  
INSTRUM spect  
PROBHD Z113652\_0266 ( )  
PULPROG zg30  
TD 65536  
SOLVENT MeOD  
NS 16  
DS 2  
SWH 10000.000 Hz  
FIDRES 0.305176 Hz  
AQ 3.2767999 sec  
RG 91.87  
DW 50.000 usec  
DE 13.50 usec  
TE 298.1 K  
D1 1.00000000 sec  
TD0 1  
SFO1 500.1330883 MHz  
NUC1 1H  
P1 10.00 usec  
PLW1 21.07600021 W

F2 - Processing parameters  
SI 65536  
SF 500.1300000 MHz  
WDW EM  
SSB 0  
LB 0.30 Hz  
GB 0  
PC 1.00

# 16a

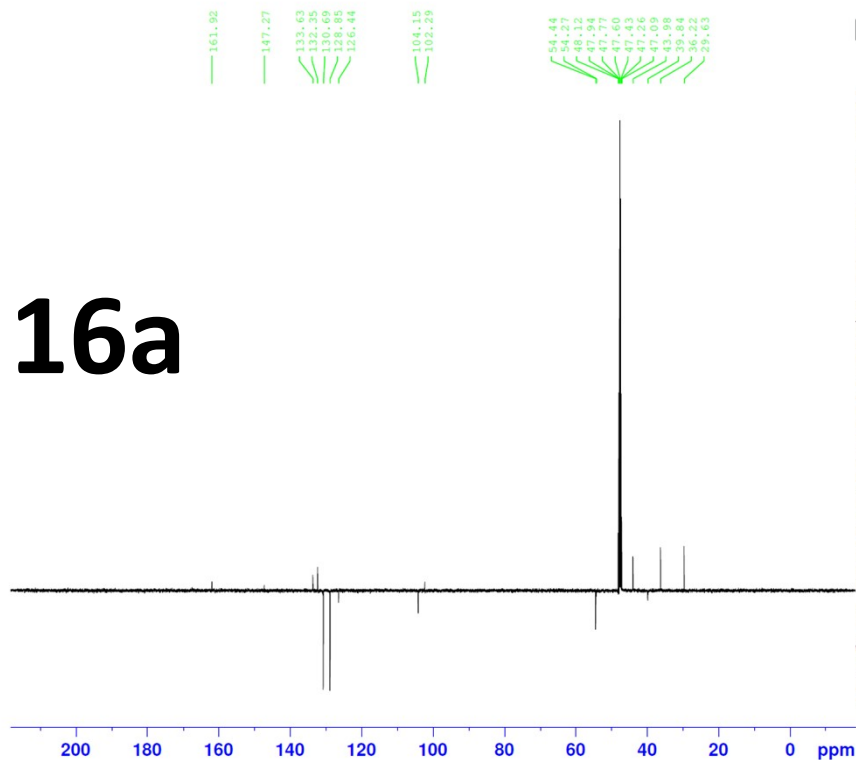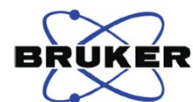

Current Data Parameters  
NAME NA1111 MeOD  
EXPNO 2  
PROCNO 1

F2 - Acquisition Parameters  
Date\_ 20200226  
Time 22.49 h  
INSTRUM spect  
PROBHD Z113652\_0266 ( )  
PULPROG jmod  
TD 65536  
SOLVENT MeOD  
NS 1024  
DS 4  
SWH 29761.904 Hz  
FIDRES 0.908261 Hz  
AQ 1.1010048 sec  
RG 189.93  
DW 16.800 usec  
DE 6.50 usec  
TE 298.1 K  
CNST2 145.0000000  
CNST11 1.0000000  
D1 2.00000000 sec  
D20 0.00689655 sec  
TD0 1  
SFO1 125.7703643 MHz  
NUC1 13C  
P1 10.00 usec  
P2 20.00 usec  
PLW1 74.02700043 W  
SFO2 500.1320005 MHz  
NUC2 1H  
CPDPRG2 waltz16  
PCPD2 80.00 usec  
PLW2 21.07600021 W  
PLW12 0.32931000 W

F2 - Processing parameters  
SI 32768  
SF 125.7577885 MHz  
WDW EM  
SSB 0  
LB 1.00 Hz  
GB 0  
PC 1.40

# 16b

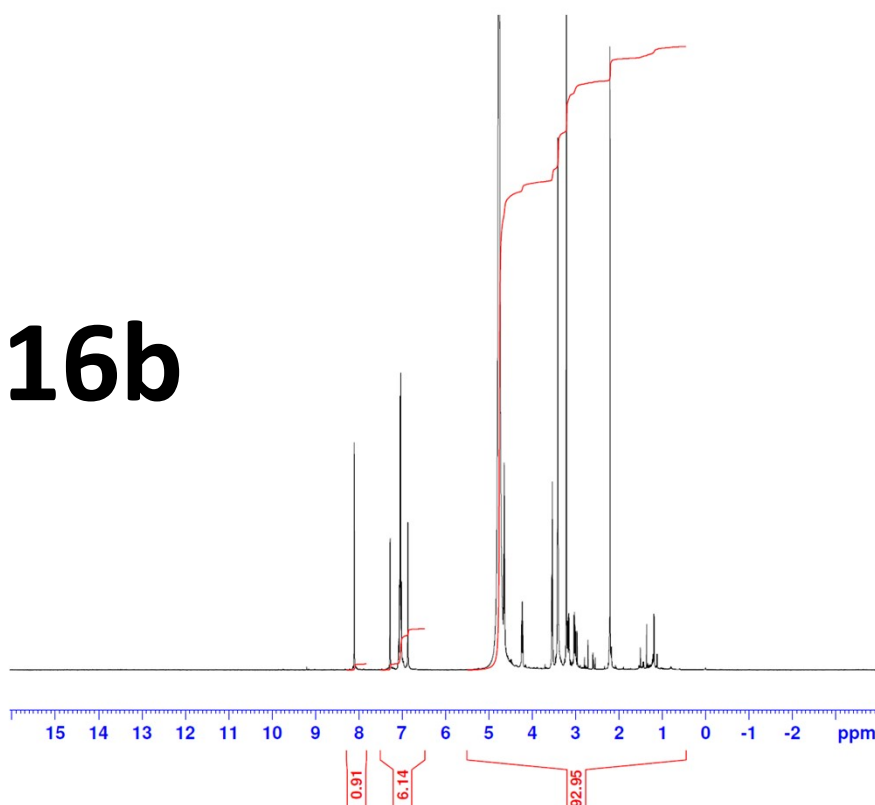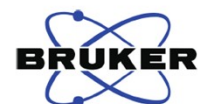

Current Data Parameters  
 NAME NA1112  
 EXPNO 1  
 PROCNO 1

F2 - Acquisition Parameters  
 Date\_ 20200225  
 Time 15.44 h  
 INSTRUM spect  
 PROBHD Z113652\_0266 (   
 PULPROG zg30  
 ID 65536  
 SOLVENT MeOD  
 NS 16  
 DS 2  
 SWH 10000.000 Hz  
 FIDRES 0.305176 Hz  
 AQ 3.2767999 sec  
 RG 76.2  
 DW 50.000 usec  
 DE 13.50 usec  
 TE 298.1 K  
 D1 1.00000000 sec  
 TD0 1  
 SFO1 500.1330883 MHz  
 NUC1 1H  
 P1 10.00 usec  
 PLW1 21.07600021 W

F2 - Processing parameters  
 SI 65536  
 SF 500.1300594 MHz  
 WDW EM  
 SSB 0  
 LB 0.30 Hz  
 GB 0  
 PC 1.00

# 16b

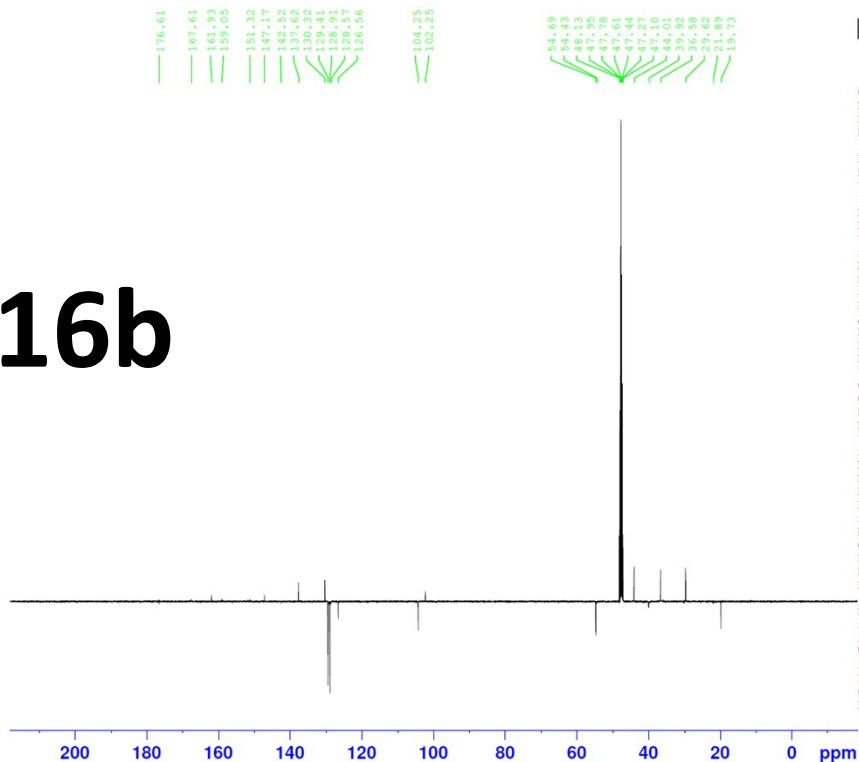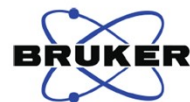

Current Data Parameters  
 NAME NA1112  
 EXPNO 2  
 PROCNO 1

F2 - Acquisition Parameters  
 Date\_ 20200226  
 Time 0.40 h  
 INSTRUM spect  
 PROBHD Z113652\_0266 (   
 PULPROG jmod  
 ID 65536  
 SOLVENT MeOD  
 NS 3072  
 DS 4  
 SWH 29761.904 Hz  
 FIDRES 0.908261 Hz  
 AQ 1.1010048 sec  
 RG 189.93  
 DW 16.800 usec  
 DE 6.50 usec  
 TE 298.1 K  
 CNST2 145.0000000  
 CNST11 1.0000000  
 D1 2.00000000 sec  
 D20 0.00689655 sec  
 TD0 1  
 SFO1 125.7703643 MHz  
 NUC1 13C  
 P1 10.00 usec  
 P2 20.00 usec  
 PLW1 74.02700043 W  
 SFO2 500.1320005 MHz  
 NUC2 1H  
 CPDPRG[2] waltz16  
 PCPD2 80.00 usec  
 PLW2 21.07600021 W  
 PLW12 0.32931000 W

F2 - Processing parameters  
 SI 32768  
 SF 125.7577885 MHz  
 WDW EM  
 SSB 0  
 LB 1.00 Hz  
 GB 0  
 PC 1.40

# 16c

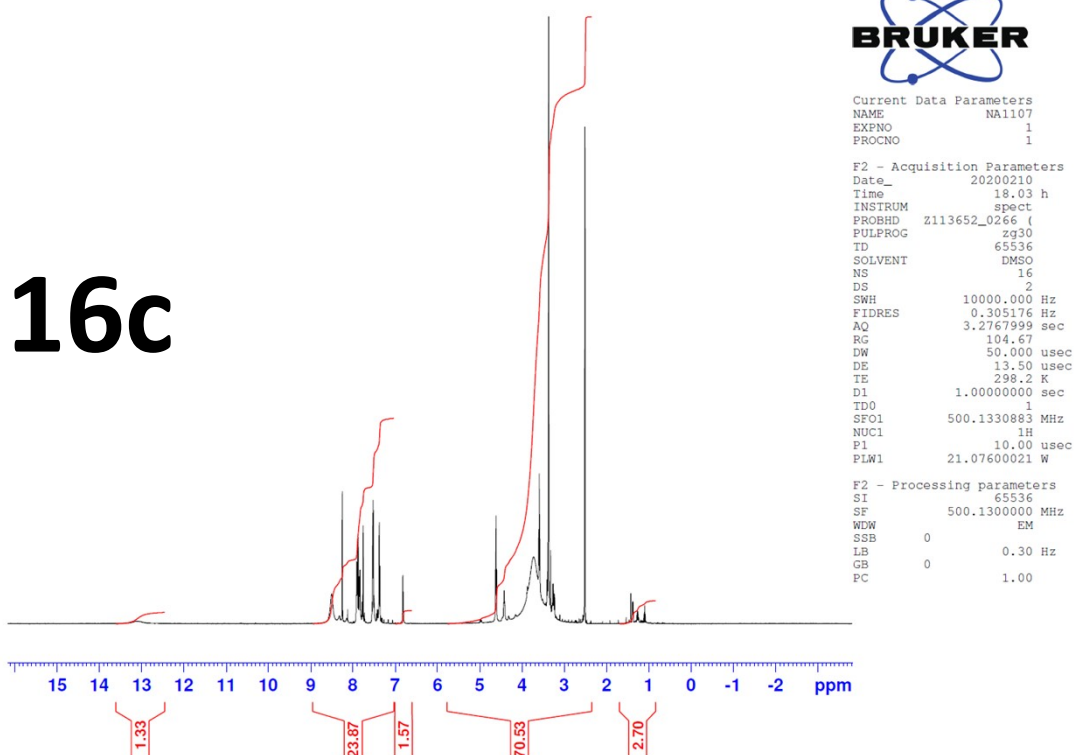

# 16c

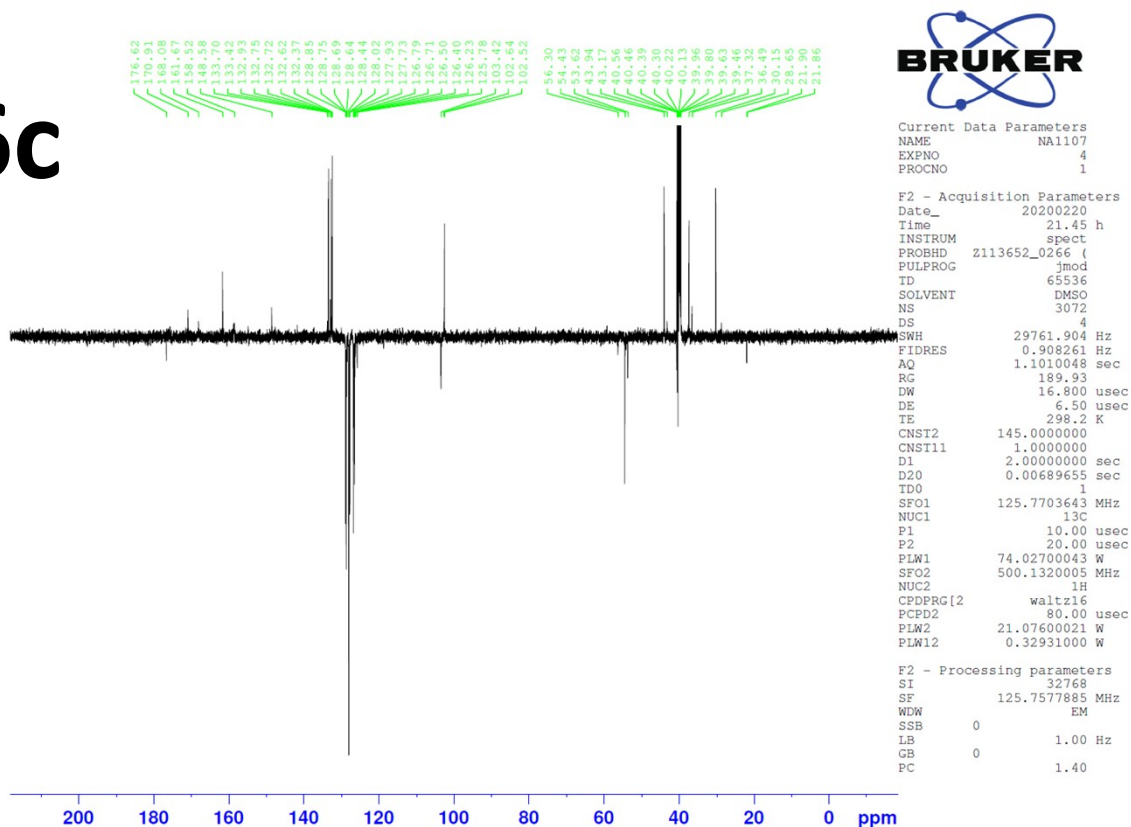

### 3.3. HPLC Charts:

5a

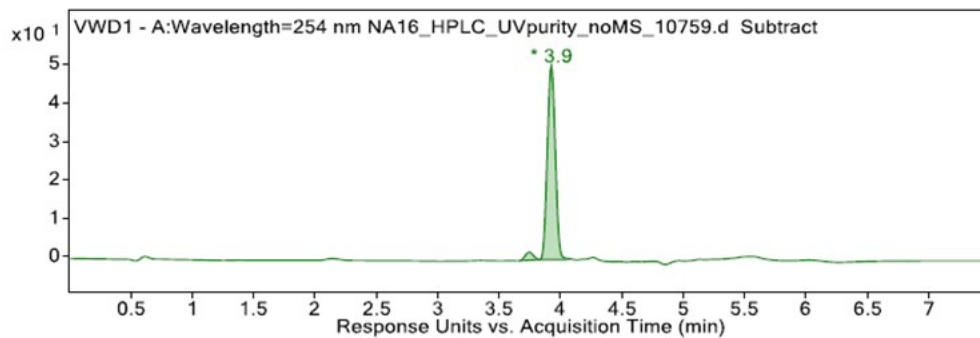

Figure: Base peak or HPLC chromatogram (indicated in left hand corner)

User Chromatogram Peak List

| RT (min) | Area   | Area % | Area Sum (%) | Symmetry | Width (min) |
|----------|--------|--------|--------------|----------|-------------|
| 3.70     | 9.62   | 4.21   | 4.04         | 1.25     | 0.200       |
| 3.90     | 228.55 | 100.00 | 95.96        | 1.02     | 0.200       |

5b

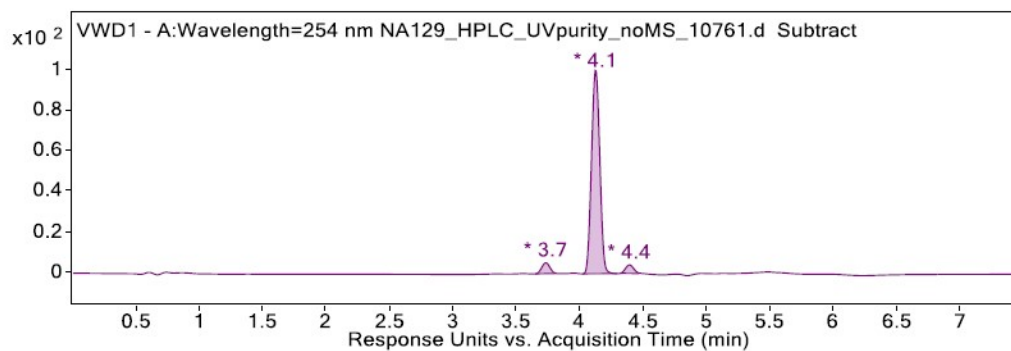

Figure: Base peak or HPLC chromatogram (indicated in left hand corner)

User Chromatogram Peak List

| RT (min) | Area   | Area % | Area Sum (%) | Symmetry | Width (min) |
|----------|--------|--------|--------------|----------|-------------|
| 3.70     | 23.51  | 5.17   | 4.73         | 1.19     | 0.200       |
| 4.10     | 454.63 | 100.00 | 91.53        | 1.14     | 0.300       |
| 4.40     | 18.54  | 4.08   | 3.73         | 1.23     | 0.100       |

6a

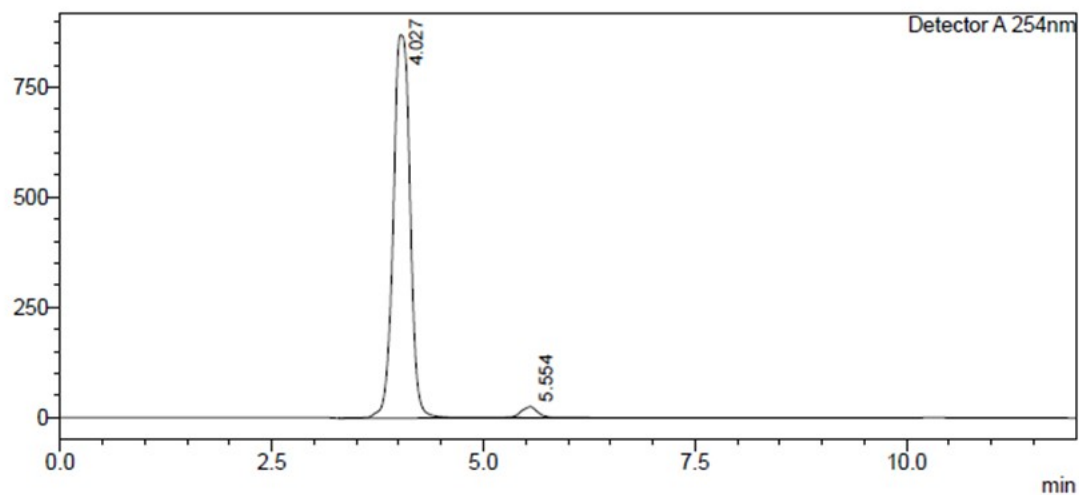

<Peak Table>

Detector A 254nm

| Peak# | Ret. Time | Area     | Height | Conc.  | Area%   | Unit | Mark |
|-------|-----------|----------|--------|--------|---------|------|------|
| 1     | 4.027     | 12067622 | 869684 | 97.334 | 97.334  |      | S    |
| 2     | 5.554     | 330540   | 24671  | 2.666  | 2.666   |      | TV   |
| Total |           | 12398162 | 894354 |        | 100.000 |      |      |

6b

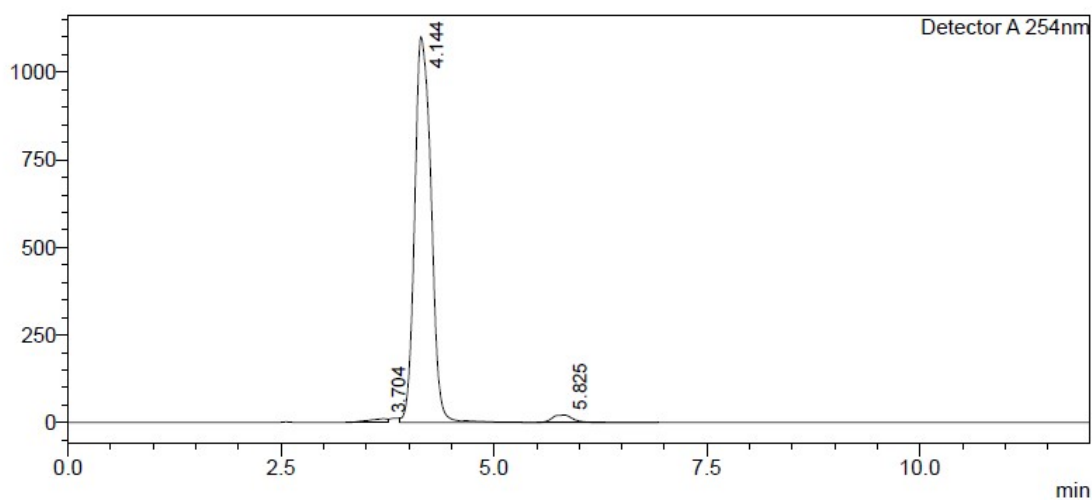

<Peak Table>

Detector A 254nm

| Peak# | Ret. Time | Area     | Height  | Conc.  | Area%   | Unit | Mark |
|-------|-----------|----------|---------|--------|---------|------|------|
| 1     | 3.704     | 172783   | 10747   | 1.123  | 1.123   |      |      |
| 2     | 4.144     | 14873977 | 1100700 | 96.664 | 96.664  |      | SV   |
| 3     | 5.825     | 340571   | 21063   | 2.213  | 2.213   |      | T    |
| Total |           | 15387331 | 1132510 |        | 100.000 |      |      |



6c

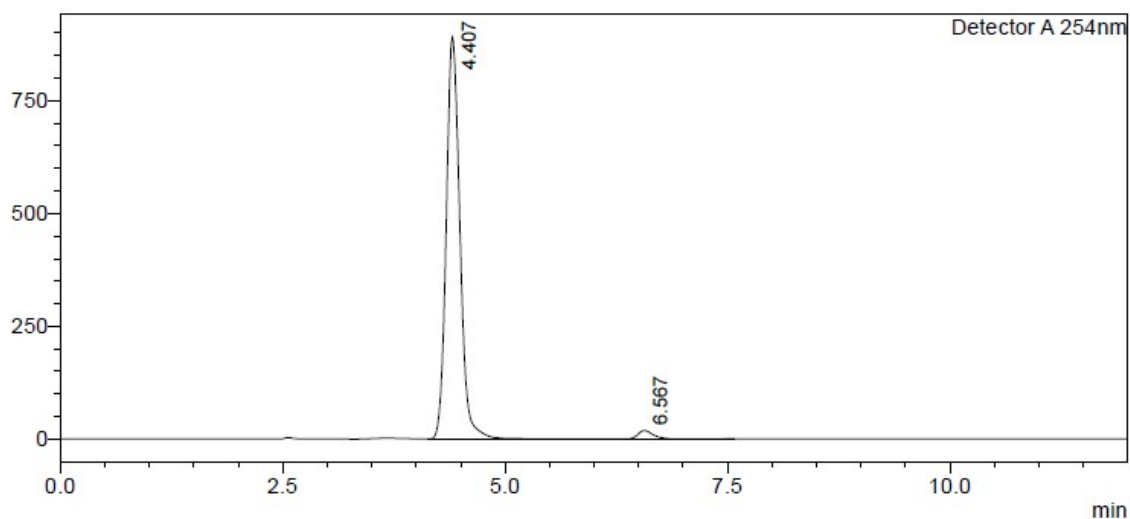

## &lt;Peak Table&gt;

Detector A 254nm

| Peak# | Ret. Time | Area    | Height | Conc.  | Area%   | Unit | Mark |
|-------|-----------|---------|--------|--------|---------|------|------|
| 1     | 4.407     | 9583264 | 891048 | 97.632 | 97.632  |      | SV   |
| 2     | 6.567     | 232408  | 18956  | 2.368  | 2.368   |      | T    |
| Total |           | 9815672 | 910004 |        | 100.000 |      |      |

6d

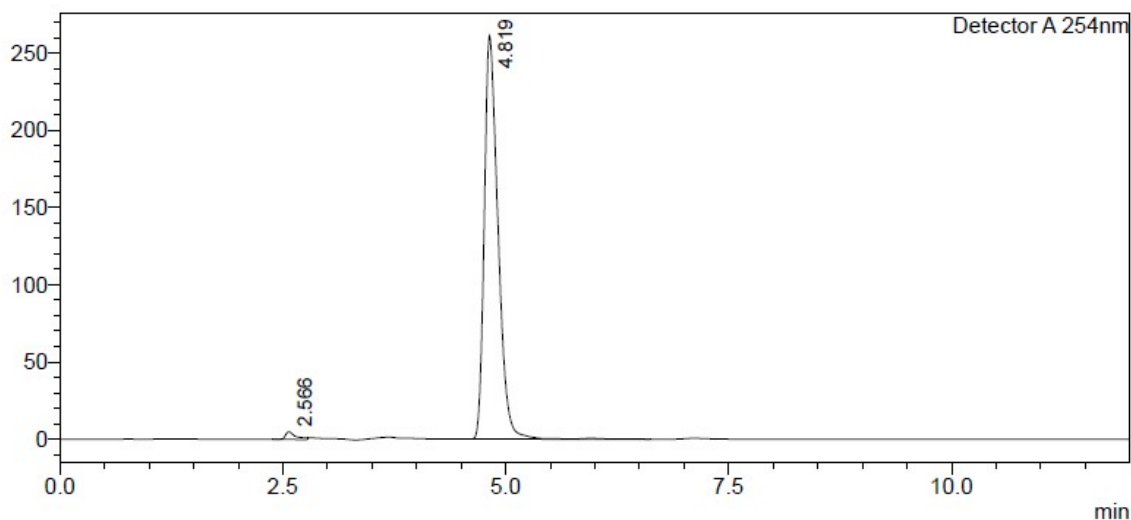

## &lt;Peak Table&gt;

Detector A 254nm

| Peak# | Ret. Time | Area    | Height | Conc.  | Area%   | Unit | Mark |
|-------|-----------|---------|--------|--------|---------|------|------|
| 1     | 2.566     | 38346   | 4863   | 1.353  | 1.353   |      |      |
| 2     | 4.819     | 2794845 | 261036 | 98.647 | 98.647  |      | S    |
| Total |           | 2833191 | 265899 |        | 100.000 |      |      |



6e

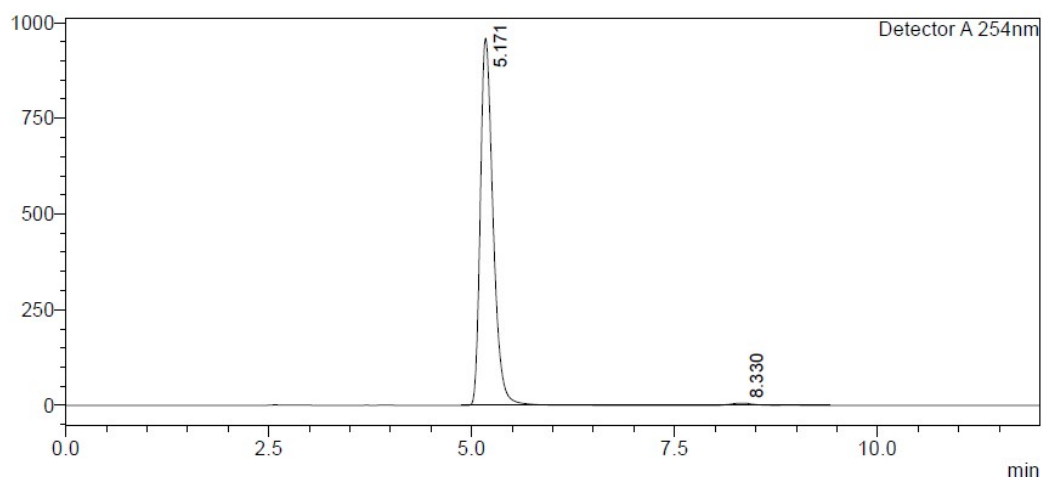

<Peak Table>

Detector A 254nm

| Peak# | Ret. Time | Area     | Height | Conc.  | Area%   | Unit | Mark |
|-------|-----------|----------|--------|--------|---------|------|------|
| 1     | 5.171     | 10438829 | 958772 | 98.975 | 98.975  |      | S    |
| 2     | 8.330     | 108114   | 5998   | 1.025  | 1.025   |      | T    |
| Total |           | 10546943 | 964770 |        | 100.000 |      |      |

7a

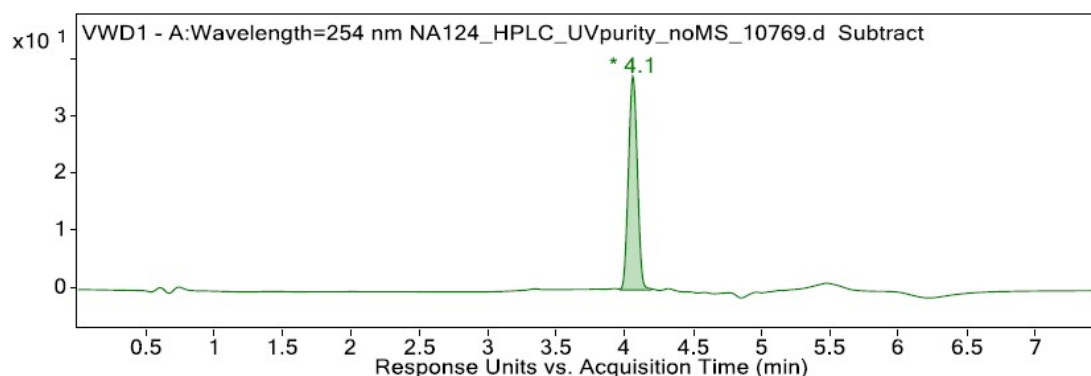

Figure: Base peak or HPLC chromatogram (indicated in left hand corner)

User Chromatogram Peak List

| RT (min) | Area   | Area % | Area Sum (%) | Symmetry | Width (min) |
|----------|--------|--------|--------------|----------|-------------|
| 4.10     | 169.54 | 100.00 | 100.00       | 1.09     | 0.200       |

7b

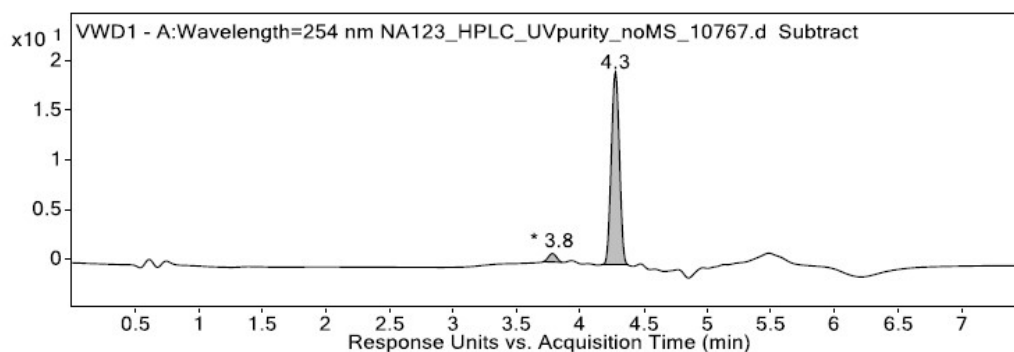

Figure: Base peak or HPLC chromatogram (indicated in left hand corner)

User Chromatogram Peak List

| RT (min) | Area  | Area % | Area Sum (%) | Symmetry | Width (min) |
|----------|-------|--------|--------------|----------|-------------|
| 3.80     | 3.72  | 4.30   | 4.12         | 1.06     | 0.100       |
| 4.30     | 86.49 | 100.00 | 95.88        | 0.96     | 0.200       |

7c

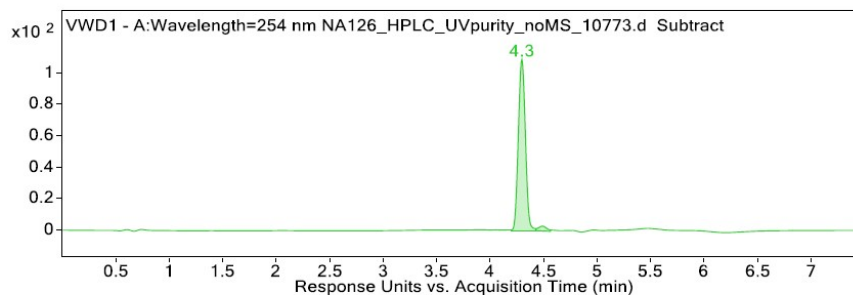

Figure: Base peak or HPLC chromatogram (indicated in left hand corner)

User Chromatogram Peak List

| RT (min) | Area   | Area % | Area Sum (%) | Symmetry | Width (min) |
|----------|--------|--------|--------------|----------|-------------|
| 4.30     | 500.35 | 100.00 | 96.79        | 1.03     | 0.200       |
| 4.50     | 16.59  | 3.32   | 3.21         | 1.22     | 0.100       |

# 7d

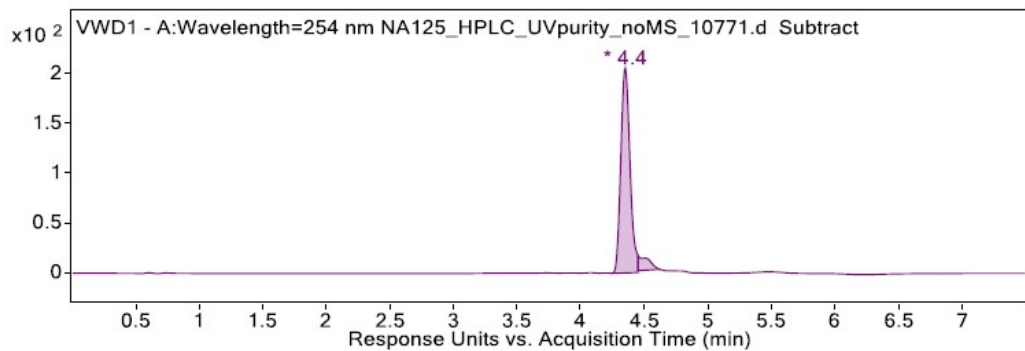

Figure: Base peak or HPLC chromatogram (indicated in left hand corner)

User Chromatogram Peak List

| RT (min) | Area    | Area % | Area Sum (%) | Symmetry | Width (min) |
|----------|---------|--------|--------------|----------|-------------|
| 4.40     | 1031.23 | 100.00 | 92.43        | 1.36     | 0.200       |
| 4.50     | 84.51   | 8.20   | 7.57         | Infinity | 0.200       |

# 9a

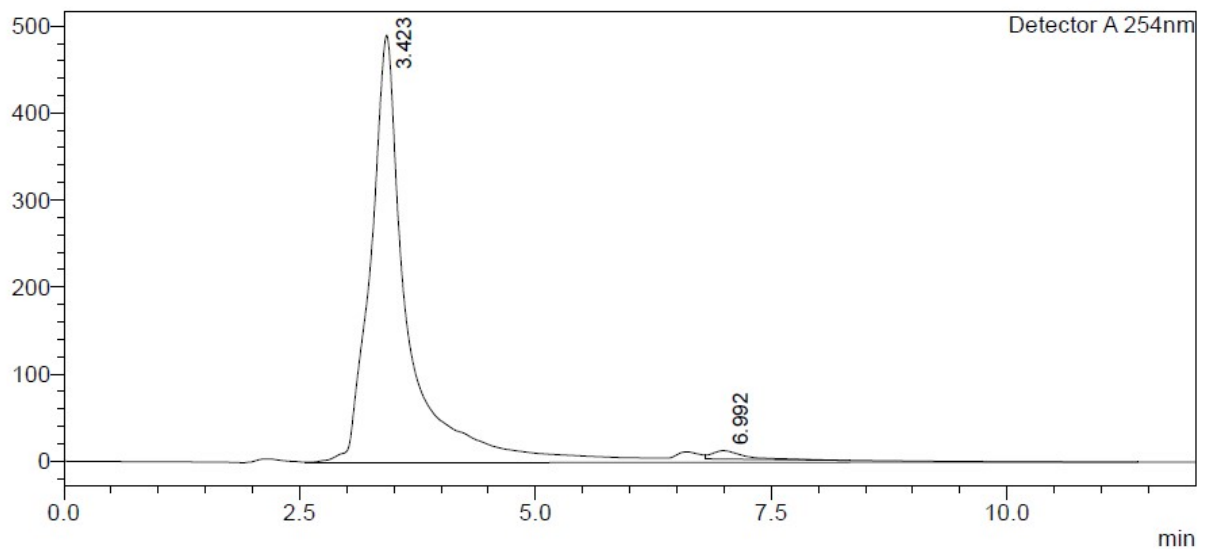

<Peak Table>

Detector A 254nm

| Peak# | Ret. Time | Area     | Height | Conc.  | Unit | Mark | Name |
|-------|-----------|----------|--------|--------|------|------|------|
| 1     | 3.423     | 14074909 | 491002 | 98.420 |      | SV   |      |
| 2     | 6.992     | 225940   | 9393   | 1.580  |      | TV   |      |
| Total |           | 14300849 | 500395 |        |      |      |      |

9b

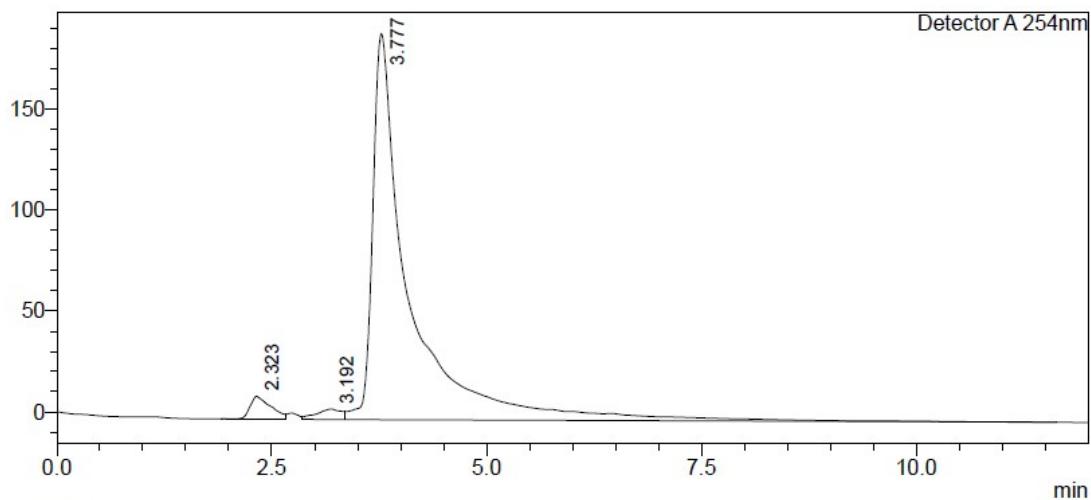

<Peak Table>

Detector A 254nm

| Peak# | Ret. Time | Area    | Height | Conc.  | Area%   | Unit | Mark |
|-------|-----------|---------|--------|--------|---------|------|------|
| 1     | 2.323     | 187965  | 11295  | 3.135  | 3.135   |      |      |
| 2     | 3.192     | 102866  | 5150   | 1.716  | 1.716   |      | V    |
| 3     | 3.777     | 5705411 | 190986 | 95.150 | 95.150  |      | SV   |
| Total |           | 5996242 | 207430 |        | 100.000 |      |      |

9c

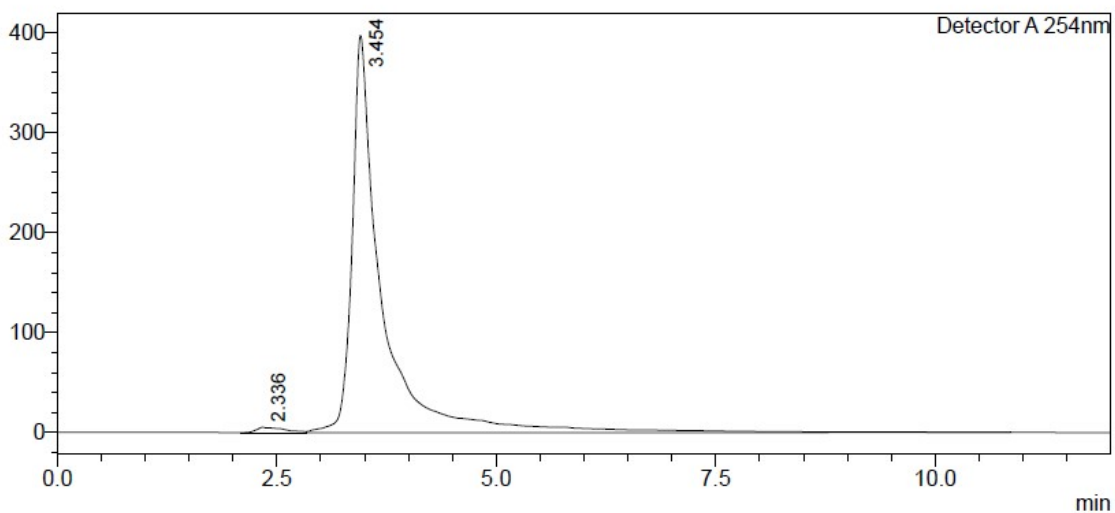

<Peak Table>

Detector A 254nm

| Peak# | Ret. Time | Area    | Height | Conc.  | Area%   | Unit | Mark |
|-------|-----------|---------|--------|--------|---------|------|------|
| 1     | 2.336     | 115196  | 5326   | 1.199  | 1.199   |      |      |
| 2     | 3.454     | 9492896 | 397489 | 98.801 | 98.801  |      | SV   |
| Total |           | 9608093 | 402815 |        | 100.000 |      |      |

9d

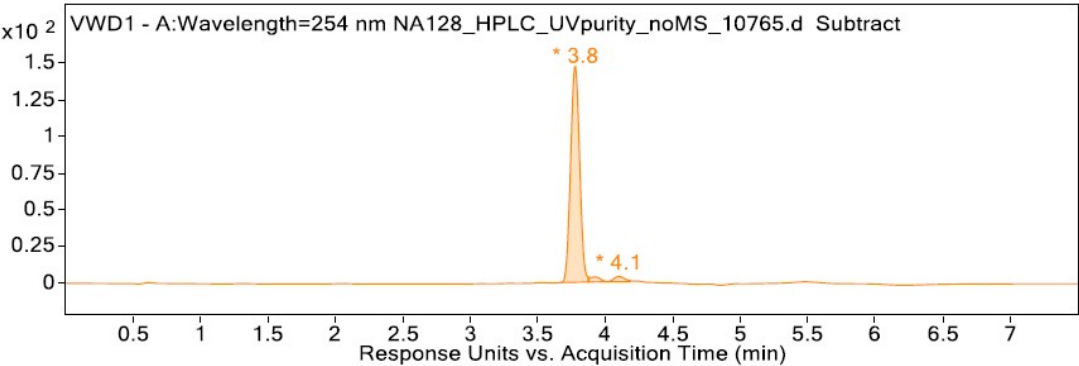

Figure: Base peak or HPLC chromatogram (indicated in left hand corner)

User Chromatogram Peak List

| RT (min) | Area   | Area % | Area Sum (%) | Symmetry | Width (min) |
|----------|--------|--------|--------------|----------|-------------|
| 3.80     | 684.74 | 100.00 | 94.81        | 0.98     | 0.200       |
| 3.90     | 17.91  | 2.62   | 2.48         | 1.79     | 0.100       |
| 4.10     | 19.57  | 2.86   | 2.71         | 1.29     | 0.200       |

9e

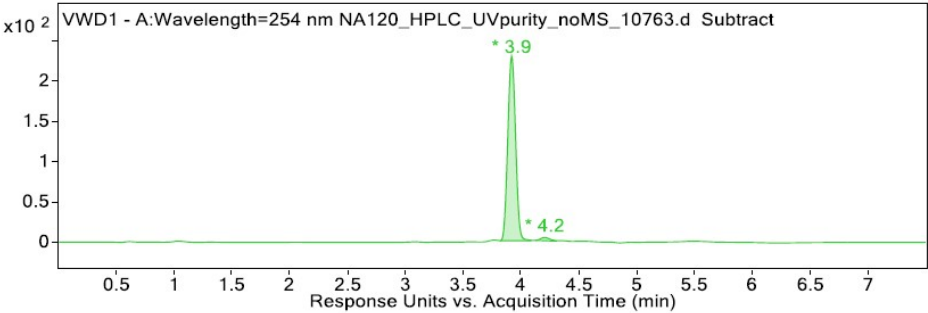

Figure: Base peak or HPLC chromatogram (indicated in left hand corner)

User Chromatogram Peak List

| RT (min) | Area    | Area % | Area Sum (%) | Symmetry | Width (min) |
|----------|---------|--------|--------------|----------|-------------|
| 3.90     | 1072.78 | 100.00 | 97.96        | 1.09     | 0.300       |
| 4.20     | 22.36   | 2.08   | 2.04         | 0.95     | 0.200       |

# 16a

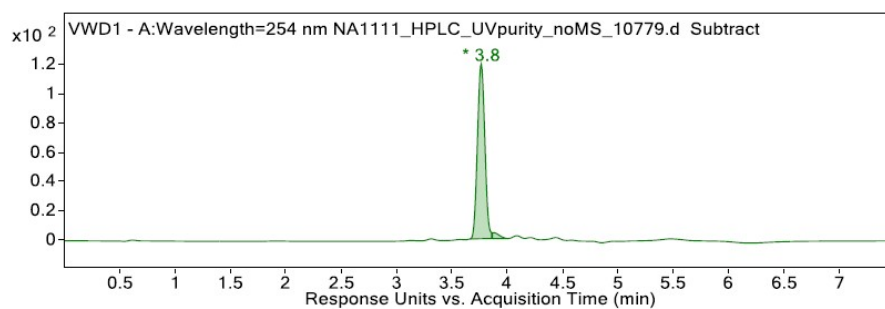

Figure: Base peak or HPLC chromatogram (indicated in left hand corner)

User Chromatogram Peak List

| RT (min) | Area   | Area % | Area Sum (%) | Symmetry | Width (min) |
|----------|--------|--------|--------------|----------|-------------|
| 3.80     | 552.97 | 100.00 | 97.05        | 1.03     | 0.200       |
| 3.90     | 16.78  | 3.04   | 2.95         | Infinity | 0.100       |

# 16b

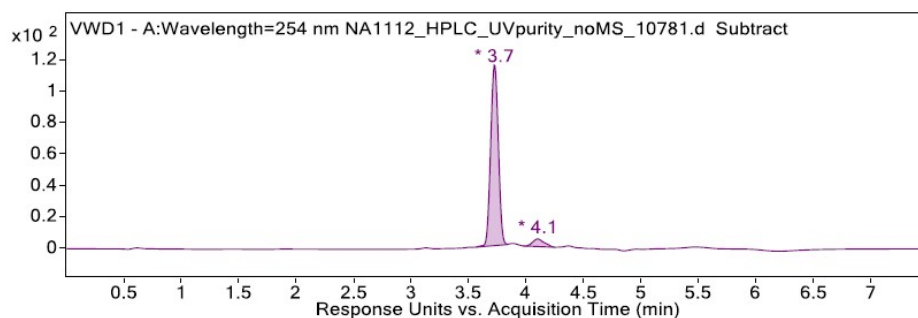

Figure: Base peak or HPLC chromatogram (indicated in left hand corner)

User Chromatogram Peak List

| RT (min) | Area   | Area % | Area Sum (%) | Symmetry | Width (min) |
|----------|--------|--------|--------------|----------|-------------|
| 3.70     | 532.75 | 100.00 | 94.03        | 1.15     | 0.300       |
| 4.10     | 33.81  | 6.35   | 5.97         | 1.15     | 0.300       |

# 16c

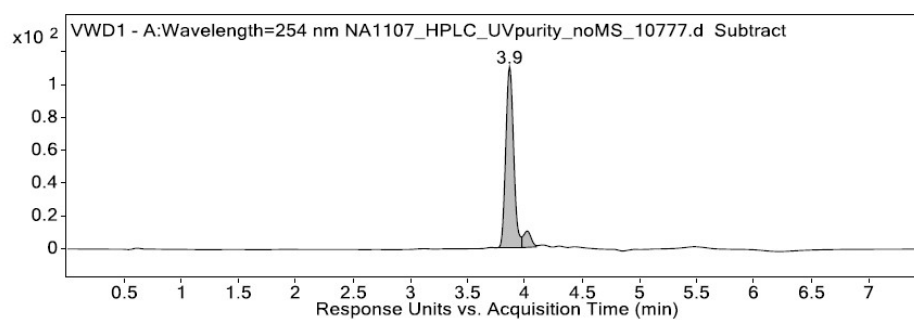

Figure: Base peak or HPLC chromatogram (indicated in left hand corner)

User Chromatogram Peak List

| RT (min) | Area  | Area % | Area Sum (%) | Symmetry | Width (min) |
|----------|-------|--------|--------------|----------|-------------|
| 3.90     | 528.3 | 100.00 | 91.73        | 1.19     | 0.200       |
| 4.00     | 47.6  | 9.01   | 8.27         | 1.71     | 0.100       |

## References:

1. P. Labute, C. Williams, M. Feher, E. Sourial and J. M. Schmidt, *J. Med. Chem.*, 2001, **44**, 1483-1490.
2. F. Madeira, Y. M. Park, J. Lee, N. Buso, T. Gur, N. Madhusoodanan, P. Basutkar, A. R. N. Tivey, S. C. Potter, R. D. Finn and R. Lopez, *Nucleic Acids Res.*, 2019, **47**, 636-641, Accessible from: [<https://www.ebi.ac.uk/Tools/msa/clustalo/>].
3. C. J. Williams, J. J. Headd, N. W. Moriarty, M. G. Prisant, L. L. Videau, L. N. Deis, V. Verma, D. A. Keedy, B. J. Hintze and V. B. Chen, *Protein Sci.*, 2018, **27**, 293-315.
4. M. Wiederstein and M. J. Sippl, *Nucleic Acids Res.*, 2007, **35**, W407-W410, Accessible from: [<https://prosa.services.came.sbg.ac.at/prosa.php>].
5. M. J. Sippl, *Proteins: Struct., Funct., Bioinf.*, 1993, **17**, 355-362.
6. D. Eisenberg, R. Lüthy and J. U. Bowie, *Meth. Enzymol*, 1997, **277**, 396-404.
7. S. S. Elbaramawi, C. Hughes, J. Richards, A. Gupta, S. M. Ibrahim, E.-S. M. Lashine, M. E. El-Sadek, A. J. O'Neill, M. Wootton and J. M. Bullard, *Egypt. J. Chem.*, 2018, **61**, 9-25.
8. Ş. Demirayak, K. Benkli and K. Güven, *Eur. J. Med. Chem.*, 2000, **35**, 1037-1040.
9. G. H. Hitchings, K. W. Ledig and R. A. West, *US Pat.*, US3037980A , 1962.
